# Supplementary material for: Proteome analysis of Aspergillus flavus isolate-specific responses to oxidative stress in relationship to aflatoxin production capability
Source: PubMed Central journal article supplement (PMC5821837; doi:10.1038/s41598-018-21653-x), 2018-02-21
Supplement: 41598_2018_21653_MOESM1_ESM.pdf [file 41598_2018_21653_MOESM1_ESM.pdf]

# **Proteome analysis of *Aspergillus flavus* isolate-specific responses to oxidative stress in relationship to aflatoxin production capability**

## **Supplemental Information**

Jake C. Fountain<sup>1,2</sup>, Jin Koh<sup>3</sup>, Liming Yang<sup>1,2,4</sup>, Manish K. Pandey<sup>5</sup>, Spurthi N. Nayak<sup>5</sup>, Prasad Bajaj<sup>5</sup>, Wei-Jian Zhuang<sup>6</sup>, Zhi-Yuan Chen<sup>7</sup>, Robert C. Kemerait<sup>1</sup>, R. Dewey Lee<sup>8</sup>, Sixue Chen<sup>3</sup>, Rajeev K. Varshney<sup>5</sup>, Baozhu Guo<sup>2,\*</sup>

<sup>1</sup> Department of Plant Pathology, University of Georgia, Tifton, GA, USA

<sup>2</sup> USDA-ARS Crop Protection and Management Research Unit, Tifton, GA, USA

<sup>3</sup> Interdisciplinary Center for Biotechnology Research, University of Florida, Gainesville, FL, USA

<sup>4</sup> School of Life Sciences, Huaiyin Normal University, Huaian, Jiangsu, China

<sup>5</sup> International Crop Research Institute for the Semi-Arid Tropics (ICRISAT), Patancheru, Telangana, India

<sup>6</sup> College of Life Sciences, Fujian Agriculture and Forestry University, Fuzhou, Fujian, China

<sup>7</sup> College of Plant Protection, Fujian Agriculture and Forestry University, Fuzhou, Fujian, China

**\*Corresponding Author:**

Dr. Baozhu Guo

[baozhu.guo@ars.usda.gov](mailto:baozhu.guo@ars.usda.gov)

## Supplemental Figures

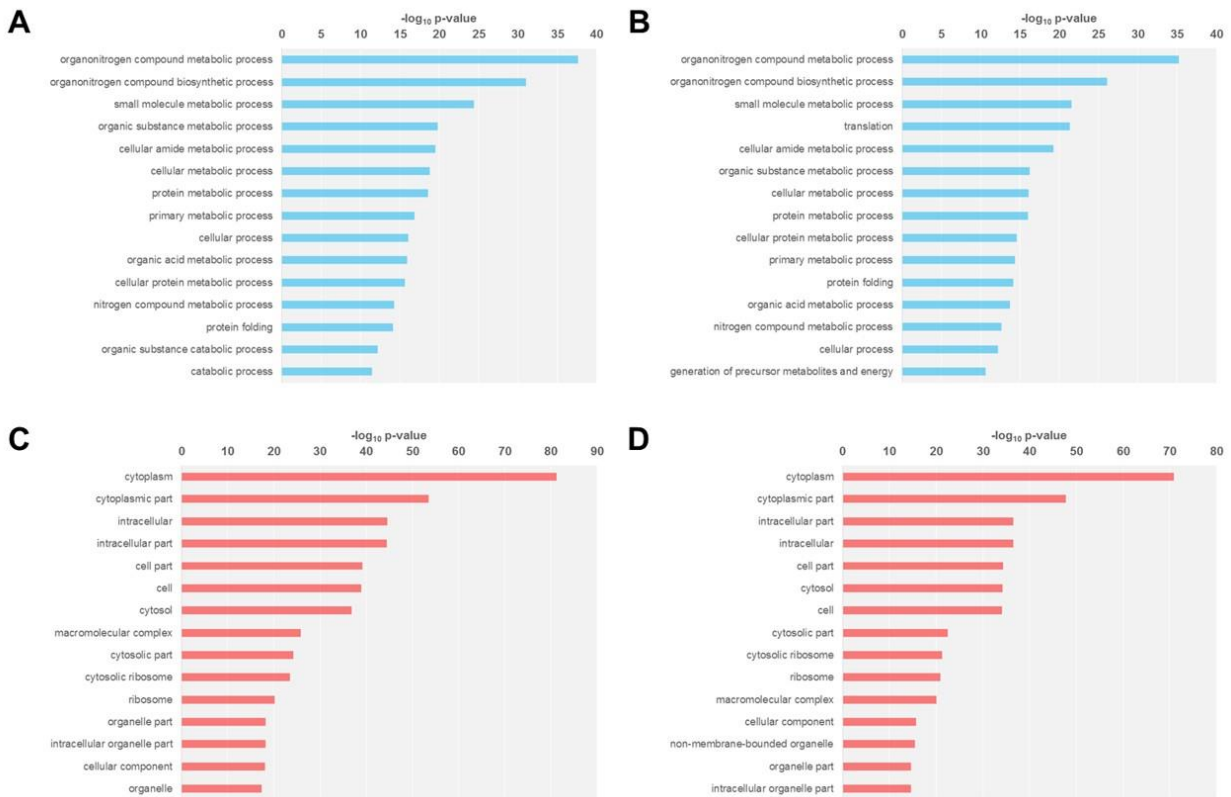

**Figure S1. Gene ontology (GO) enrichment analysis by replication.** Gene ontology (GO) analysis for biological function (A, B) and cellular localization (C, D) was performed for all 1,173 proteins detected (A, C), and for the 799 proteins detected in all three biological replicates of the study (B, D). The plots show the top 15 GO categories sorted in decreasing order by  $-\log_{10}$  (p-value). Overall, the results between the two data sets were very similar with most of the top enriched GO terms held in common for both biological function and cellular localization.

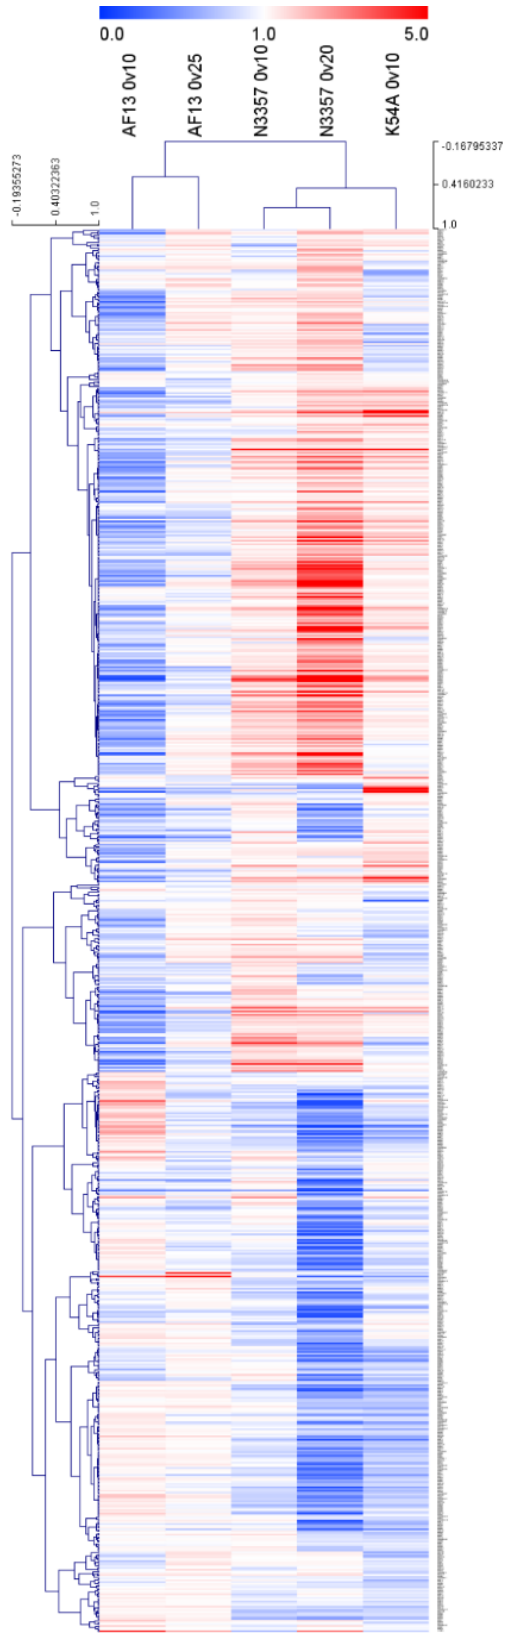

**Figure S2. Heatmap and hierarchical clustering analyses of protein relative expression**

**patterns.** The heatmap represents the observed fold changes in expression for the 799 proteins found to be expressed in all three biological replicates of the experiment. Blue color represents decreased patterns. Red color represents increased patterns. Hierarchical clustering analysis of the proteins shows several distinct clades with unique expression patterns showing isolate-specific responses to stress. Overall differences in isolate expression can also be visualized in the sample-level tree.

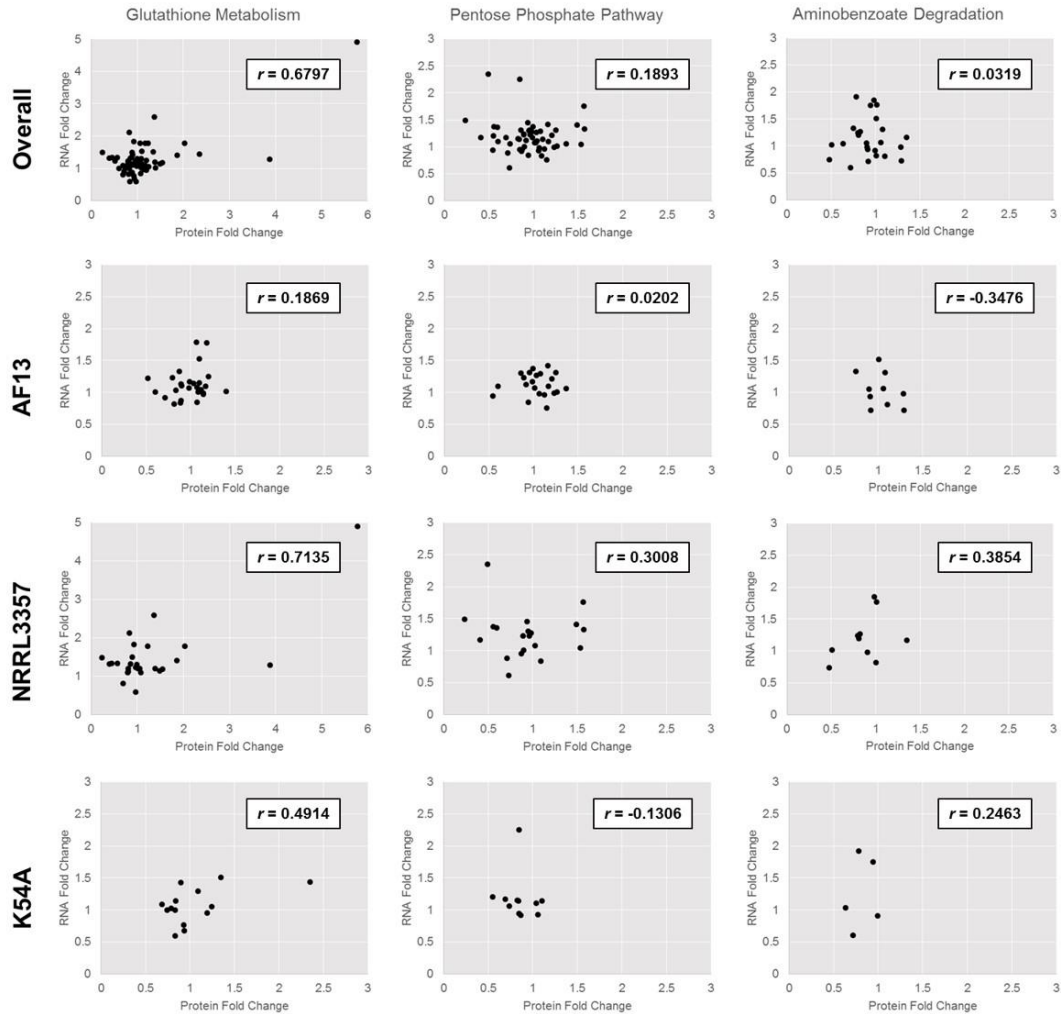

**Figure S3. Pearson correlations of proteome and transcriptome data for select metabolic pathways.** Pearson correlations of detected protein expression with corresponding transcripts when comparing the control and 10mM H<sub>2</sub>O<sub>2</sub> treatments were performed for proteins involved in glutathione metabolism, the pentose phosphate pathway, and aminobenzoate degradation for all isolates (overall plots) and for each individual isolate. Greater degrees of correlation could be observed within each pathway both overall and within each isolate than observed for all proteins and transcripts. Isolate-to-isolate variation in correlation was also observed within each pathway likely corresponding to the degree of differential expression observed for the proteins and transcripts in each pathway.

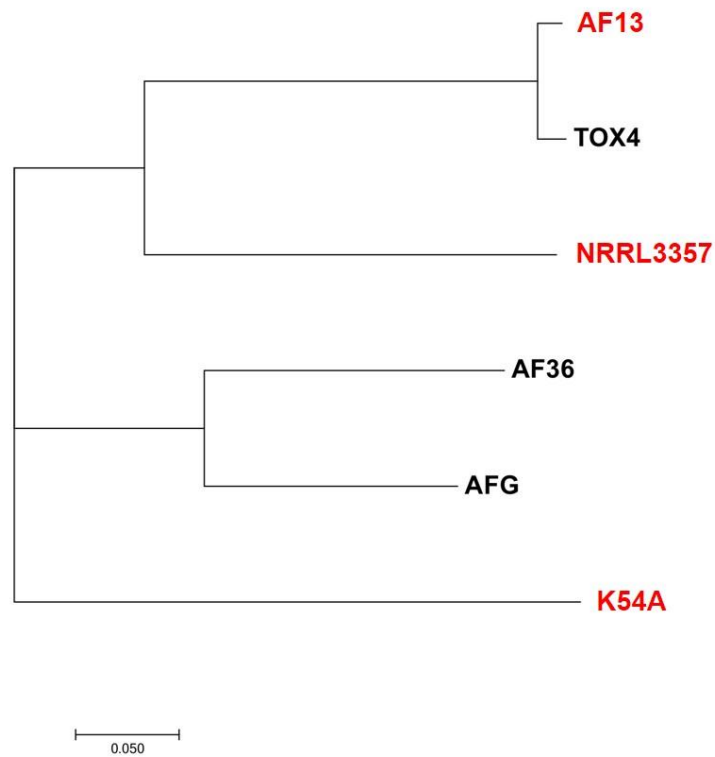

**Figure S4. Neighbor joining tree analysis of isolates examined using proteomic and/or transcriptomic analyses.** Transcriptome sequencing reads obtained in the previous experiment [30,31] were used to call high-quality SNPs for each isolate under the same experimental conditions used in the present study. These SNPs were used to build a neighbor joining tree to visualize the genetic relationship between these isolates. Isolates used in the present study are highlighted in red.

**A**

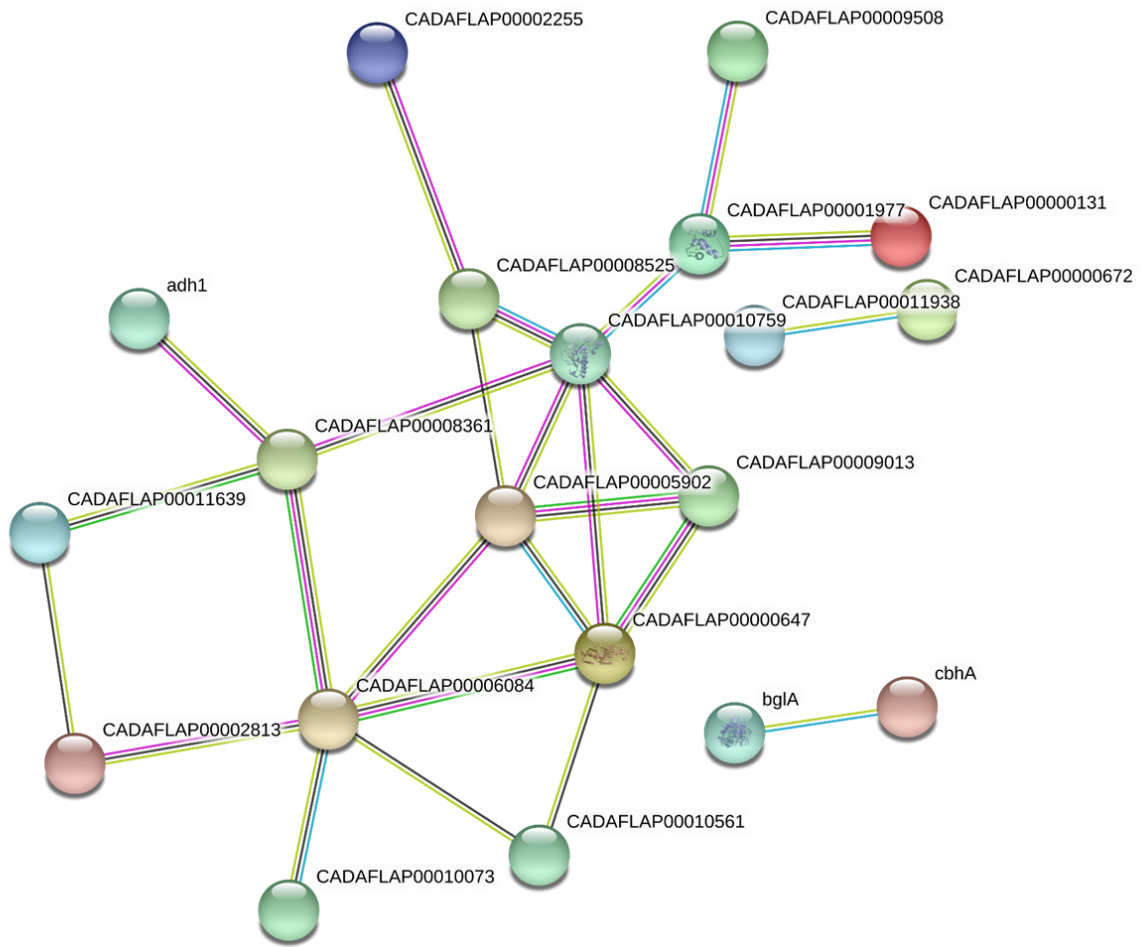





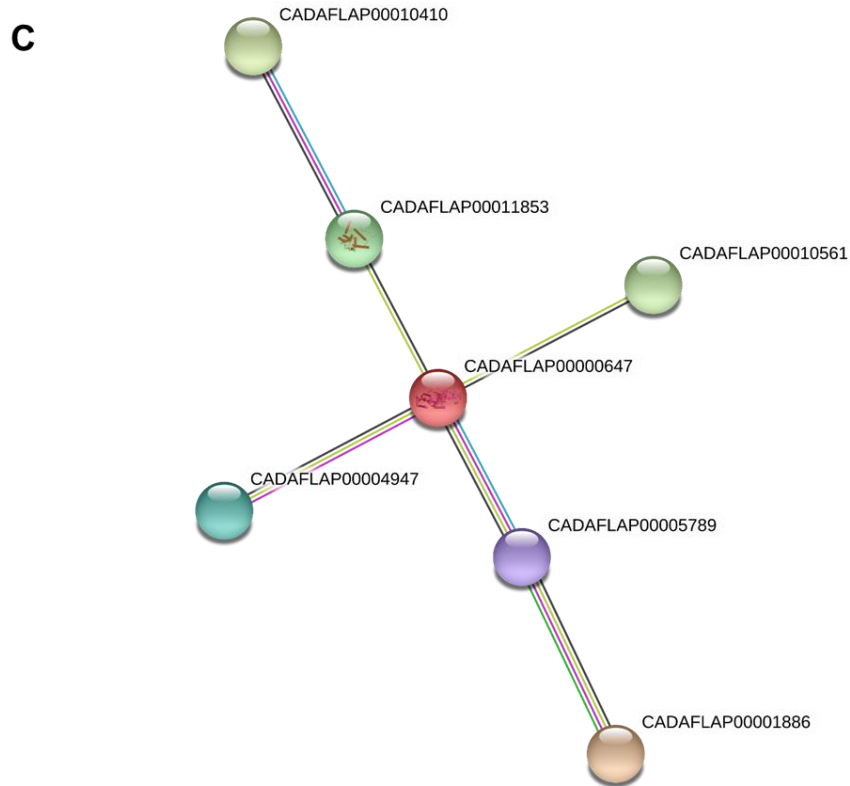

**Figure S5. STRING interaction networks for differentially expressed proteins observed in each isolate in response to increasing levels of oxidative stress.** STRING interaction plots for AF13 (A), NRRL3357 (B), and K54A (C) were performed. Nodes are colored based on software default parameters. Distance between nodes and their position relative to each other indicate their relatedness in terms of biological function, protein-protein interaction, and co-expression. Lines connecting nodes represent different forms of evidence for a relationship between the proteins connected by the nodes. Of note are the following colored lines representing available evidence of interactions: light blue: known interactions from curated databases; pink: experimentally determined interactions; dark blue: gene co-occurrence; yellow: textmining; and black: co-expression.

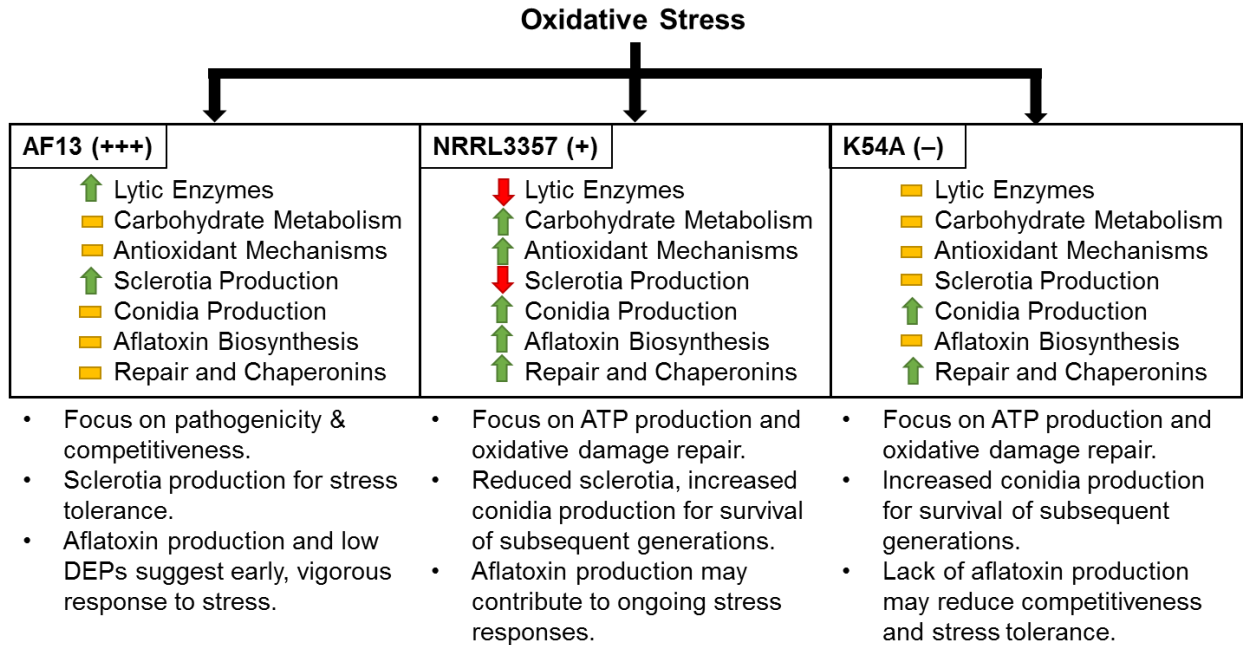

**Figure S6. Summary of isolate oxidative stress responses at the protein level.** Summary of DEPs observed in key biological pathways in each isolate under increasing oxidative stress. The green and red arrows correspond to increased and decreased expression, respectively, relative to the control. The yellow bars represent no significant changes in expression under increasing stress. Overall, AF13 exhibited increased expression of lytic enzymes and sclerotial production proteins which likely contributes to increased pathogenicity, competitiveness, and ability to endure environmental stress. Elevated aflatoxin production and stress tolerance is also likely the produce of earlier, vigorous responses not observed in the present study. Both NRRL3357 and K54A focused on oxidative damage repair and ATP generation to provide for ongoing stress responsive processes. Increased conidia production suggested by protein expression was also observed in our previous study [21] and is likely the result of efforts to ensure survival of the next generation. The lack of aflatoxin production may contribute to less stress tolerance and competitiveness in K54A.

**Table S1.** Summary of generated iTRAQ proteomics data

| <b>Data</b>       | <b><i>FDR Type</i></b> | <b>FDR</b> | <b>Rep 1</b> | <b>Rep 2</b> | <b>Rep 3</b> | <b>Average</b> |
|-------------------|------------------------|------------|--------------|--------------|--------------|----------------|
| Proteins          | Global                 | 1%         | 2,147        | 1,907        | 1,646        | 1,900          |
| Distinct Peptides | Global                 | 1%         | 19,936       | 17,479       | 17,677       | 18,364         |
| Spectra           | Global                 | 1%         | 67,246       | 66,352       | 74,767       | 69,455         |

**Table S2.** Differentially expressed proteins in *A. flavus* isolates in response to oxidative stress.

| Gene ID              | Uniprot ID | Annotation                                                     | Fold Change | q-value |
|----------------------|------------|----------------------------------------------------------------|-------------|---------|
| <b>AF13 0 v 10mM</b> |            |                                                                |             |         |
| AFLA_095660          | B8NKY3     | Immunoglobulin G-binding protein H, putative                   | 4.1150      | <0.0001 |
| AFLA_021870          | A0A0D9MMH9 | Glucanase                                                      | 3.6492      | <0.0001 |
| AFLA_026140          | B8N0S9     | Alpha-amylase                                                  | 2.9625      | 0.0001  |
| AFLA_033400          | A0A0D9N9J1 | alpha-1,2-Mannosidase                                          | 2.4351      | 0.0014  |
| AFLA_045980          | A0A0D9N070 | Prolyl oligopeptidase family protein                           | 2.3179      | <0.0001 |
| AFLA_006960          | B8NQL4     | Molecular chaperone and allergen Mod-E/Hsp90/Hsp1              | 1.8458      | <0.0001 |
| AFLA_125270          | A0A0D9MSQ9 | Uncharacterized protein                                        | 1.8241      | <0.0001 |
| AFLA_078900          | B8MXV3     | Beta-hexosaminidase                                            | 1.7422      | <0.0001 |
| AFLA_124500          | B8NML4     | Nitric oxide synthase, putative                                | 1.6632      | <0.0001 |
| AFLA_027070          | B8N394     | Acetyl-coenzyme A synthetase                                   | 1.5870      | 0.0005  |
| AFLA_130150          | A0A0D9NA25 | Uncharacterized protein                                        | 1.5467      | <0.0001 |
| AFLA_102010          | B8NU30     | Class V chitinase, putative                                    | 1.5449      | <0.0001 |
| AFLA_057770          | B8NE46     | Probable pectate lyase A                                       | 1.5206      | 0.0007  |
| AFLA_097750          | C5H8J2     | SspA                                                           | 1.5000      | 0.0044  |
| AFLA_051140          | A0A0D9MWN4 | Beta-glucosidase                                               | 1.4575      | 0.0002  |
| AFLA_034380          | B8N244     | Catalase, putative                                             | 0.6157      | <0.0001 |
| AFLA_122720          | A0A0D9MR79 | Variant SH3 domain protein                                     | 0.5557      | 0.0039  |
| AFLA_071010          | B8NK52     | Heat shock protein (Sti1), putative                            | 0.5549      | 0.0001  |
| AFLA_026020          | Q52QR9     | Calmodulin A                                                   | 0.4990      | 0.0043  |
| AFLA_022480          | B8N5C0     | 26S proteasome regulatory particle subunit Rpn8, putative      | 0.4902      | 0.0003  |
| AFLA_099650          | B8NTN4     | Woronin body major protein, putative                           | 0.4431      | <0.0001 |
| AFLA_063320          | B8NFJ8     | Uncharacterized protein                                        | 0.4424      | <0.0001 |
| AFLA_045750          | B8NBK0     | Antigenic mitochondrial protein HSP60, putative                | 0.4044      | 0.0011  |
| AFLA_070490          | B8NK00     | Uncharacterized protein                                        | 0.3927      | 0.0007  |
| AFLA_093280          | B8NKS4     | Disulfide isomerase (TigA), putative                           | 0.3892      | 0.0005  |
| AFLA_056260          | B8ND65     | Nascent polypeptide-associated complex (NAC) subunit, putative | 0.3336      | 0.0007  |
| AFLA_042700          | A0A0D9MTF9 | RNA recognition motif                                          | 0.2996      | 0.0012  |
| AFLA_133940          | B8NFW5     | Uncharacterized protein                                        | 0.2663      | <0.0001 |
| AFLA_054750          | B8ND04     | Malate dehydrogenase, NAD-dependent                            | 0.2599      | 0.0001  |
| AFLA_060110          | B8NEA2     | Uncharacterized protein                                        | 0.2151      | <0.0001 |
| AFLA_073480          | B8MW01     | Tropomyosin, putative                                          | 0.1945      | 0.0005  |
| AFLA_050270          | B8NSS6     | Conserved lysine-rich protein, putative                        | 0.1869      | <0.0001 |
| AFLA_088570          | B8MWG7     | Uncharacterized protein                                        | 0.1776      | 0.0002  |
| AFLA_031780          | B8N3U4     | Telomere and ribosome associated protein Stm1, putative        | 0.1715      | <0.0001 |
| AFLA_117640          | B8NVS7     | CipC-like antibiotic stress responsive protein                 | 0.1645      | <0.0001 |
| AFLA_093220          | B8NKR8     | Ran-specific GTPase-activating protein 1, putative             | 0.1473      | 0.0014  |
| AFLA_007700          | B8NXF1     | Uncharacterized protein                                        | 0.1456      | <0.0001 |
| AFLA_069370          | B8NIQ9     | Phosphoglycerate kinase                                        | 0.1434      | <0.0001 |
| AFLA_052860          | B8NS55     | Chaperone/heat shock protein Hsp12, putative                   | 0.1170      | <0.0001 |
| AFLA_028800          | B8N3H7     | Eukaryotic translation initiation factor 5A                    | 0.0783      | 0.0001  |
| <b>AF13 0 v 25mM</b> |            |                                                                |             |         |
| AFLA_095660          | B8NKY3     | Immunoglobulin G-binding protein H, putative                   | 15.5847     | <0.0001 |
| AFLA_048690          | A0A0D9N9P4 | Alcohol dehydrogenase GroES-like domain protein                | 4.5965      | 0.0013  |
| AFLA_004950          | B8NQA4     | Cytochrome c oxidase subunit Va, putative                      | 2.1802      | 0.0009  |

Table S2. Cont.

| Gene ID                  | Uniprot ID | Annotation                                                    | Fold Change | q-value |
|--------------------------|------------|---------------------------------------------------------------|-------------|---------|
| AFLA_121090              | B8NWS2     | Uncharacterized protein                                       | 2.0621      | 0.0051  |
| AFLA_099010              | B8NUD9     | Transaldolase                                                 | 1.7166      | <0.0001 |
| AFLA_078650              | B8MXS8     | ATP synthase subunit alpha                                    | 1.6139      | 0.0010  |
| AFLA_039410              | B8NCN4     | Cell wall serine-threonine-rich galactomannoprotein Mp1       | 1.3686      | 0.0001  |
| AFLA_119460              | A0A0D9MQY3 | NAD dependent epimerasedehydratase family protein             | 1.3553      | 0.0026  |
| AFLA_071350              | B8NJ18     | UDP-N-acetylglucosamine pyrophosphorylase                     | 1.3545      | 0.0010  |
| AFLA_006960              | B8NQL4     | Molecular chaperone and allergen Mod-E/Hsp90/Hsp1             | 1.2394      | 0.0003  |
| AFLA_076170              | B8MX30     | Uncharacterized protein                                       | 0.9241      | 0.0001  |
| AFLA_034380              | B8N244     | Catalase, putative                                            | 0.5908      | <0.0001 |
| AFLA_007700              | B8NXF1     | Uncharacterized protein                                       | 0.5875      | <0.0001 |
| AFLA_060110              | B8NEA2     | Uncharacterized protein                                       | 0.4245      | <0.0001 |
| <b>NRRL3357 0 v 10mM</b> |            |                                                               |             |         |
| AFLA_112130              | A0A0D9MS17 | Hydrophobic surface binding protein A                         | 6.9512      | 0.0001  |
| AFLA_054750              | B8ND04     | Malate dehydrogenase, NAD-dependent                           | 4.3005      | <0.0001 |
| AFLA_007700              | B8NXF1     | Uncharacterized protein                                       | 3.6045      | <0.0001 |
| AFLA_097190              | B8NU47     | Uncharacterized protein                                       | 3.1380      | 0.0003  |
| AFLA_069370              | B8NIQ9     | Phosphoglycerate kinase                                       | 3.0778      | 0.0003  |
| AFLA_130310              | B8NPF9     | Protein disulfide-isomerase                                   | 2.9678      | <0.0001 |
| AFLA_045750              | B8NBK0     | Antigenic mitochondrial protein HSP60, putative               | 2.8139      | <0.0001 |
| AFLA_012200              | B8NYQ1     | Hsp70 chaperone (HscA), putative                              | 2.4216      | <0.0001 |
| AFLA_034050              | B8N211     | Aconitate hydratase, mitochondrial                            | 2.2716      | <0.0001 |
| AFLA_028910              | B8N318     | Polyadenylate-binding protein                                 | 2.2287      | 0.0001  |
| AFLA_040120              | B8NAG7     | Flavoheмоprotein                                              | 2.2098      | 0.0002  |
| AFLA_035620              | B8N4E9     | Hsp70 chaperone BiP/Kar2, putative                            | 2.1612      | <0.0001 |
| AFLA_044620              | B8NB87     | Mitochondrial Hsp70 chaperone (Ssc70), putative               | 2.1373      | <0.0001 |
| AFLA_022380              | B8N5B0     | Molecular chaperone Hsp70                                     | 2.1337      | 0.0016  |
| AFLA_093280              | B8NKS4     | Disulfide isomerase (TigA), putative                          | 2.1103      | 0.0001  |
| AFLA_033100              | B8N3Y7     | Phosphatidylinositol transporter, putative                    | 1.8955      | <0.0001 |
| AFLA_119660              | B8NWC9     | ATP synthase subunit beta                                     | 1.7780      | 0.0026  |
| AFLA_038700              | A0A0D9NC88 | Peptide hydrolase                                             | 1.7118      | <0.0001 |
| AFLA_008310              | A0A0D9MUN9 | Thiolase N-terminal domain protein                            | 1.6783      | <0.0001 |
| AFLA_122720              | A0A0D9MR79 | Variant SH3 domain protein                                    | 1.6093      | 0.0008  |
| AFLA_023500              | A0A0D9N0I0 | Ser-Thr-rich glycosyl-phosphatidyl-inositol-anchored membrane | 1.3722      | 0.0011  |
| AFLA_027810              | A0A0D9MQC0 | Subtilase family protein                                      | 1.2614      | <0.0001 |
| AFLA_095660              | B8NKY3     | Immunoglobulin G-binding protein H, putative                  | 1.1468      | <0.0001 |
| AFLA_136640              | B8NGN7     | Translation elongation factor EF-2 subunit, putative          | 0.9712      | 0.0068  |
| AFLA_108790              | B8N8T4     | Aldehyde dehydrogenase AldA, putative                         | 0.6861      | <0.0001 |
| AFLA_112120              | B8N9R6     | Pyruvate carboxylase                                          | 0.6604      | 0.0026  |
| AFLA_045980              | A0A0D9N070 | Prolyl oligopeptidase family protein                          | 0.4090      | <0.0001 |
| <b>NRRL3357 0 v 20mM</b> |            |                                                               |             |         |
| AFLA_105920              | P41749     | Endopolygalacturonase A                                       | 13.8028     | <0.0001 |
| AFLA_112130              | A0A0D9MS17 | Hydrophobic surface binding protein A                         | 8.9999      | <0.0001 |
| AFLA_028800              | B8N3H7     | Eukaryotic translation initiation factor 5A                   | 8.8726      | <0.0001 |
| AFLA_089380              | A0A0D9MZ41 | Endo-chitosanase                                              | 8.5050      | <0.0001 |
| AFLA_045750              | B8NBK0     | Antigenic mitochondrial protein HSP60, putative               | 8.0881      | <0.0001 |

**Table S2.** Cont.

| Gene ID     | Uniprot ID | Annotation                                                      | Fold Change | q-value |
|-------------|------------|-----------------------------------------------------------------|-------------|---------|
| AFLA_069370 | B8NIQ9     | Phosphoglycerate kinase                                         | 7.5484      | <0.0001 |
| AFLA_057240 | A0A0D9MQY5 | RNA recognition motif                                           | 7.0799      | <0.0001 |
| AFLA_019230 | B8N6F9     | Mismatched base pair and cruciform DNA recognition protein      | 7.0537      | <0.0001 |
| AFLA_093220 | B8NKR8     | Ran-specific GTPase-activating protein 1, putative              | 6.9233      | <0.0001 |
| AFLA_025760 | B8N351     | 50S ribosomal protein L12                                       | 6.8469      | 0.0015  |
| AFLA_136570 | B8NGN0     | Cytochrome c                                                    | 6.8061      | <0.0001 |
| AFLA_043730 | B8NAZ8     | Nuclear protein export protein Yrb2, putative                   | 6.3921      | 0.0002  |
| AFLA_048510 | B8NSI8     | UV excision repair protein (RadW), putative                     | 6.3291      | 0.0006  |
| AFLA_066270 | B8NID1     | RNA-binding La domain protein                                   | 5.9871      | <0.0001 |
| AFLA_031780 | B8N3U4     | Telomere and ribosome associated protein Stm1, putative         | 5.9799      | <0.0001 |
| AFLA_091060 | B8NLH9     | Allergen Asp F3                                                 | 5.7723      | <0.0001 |
| AFLA_003440 | B8NQW0     | Translation initiation factor 4B                                | 5.7504      | <0.0001 |
| AFLA_044620 | B8NB87     | Mitochondrial Hsp70 chaperone (Ssc70), putative                 | 5.5549      | <0.0001 |
| AFLA_030860 | A0A0D9MYG7 | Uncharacterized protein                                         | 5.4935      | <0.0001 |
| AFLA_106310 | B8N837     | Chaperonin, putative                                            | 5.4231      | <0.0001 |
| AFLA_091990 | B8NKN3     | Peptidyl-prolyl cis-trans isomerase                             | 5.1617      | <0.0001 |
| AFLA_076710 | A0A0D9N180 | Malate dehydrogenase                                            | 4.8412      | <0.0001 |
| AFLA_028910 | B8N3I8     | Polyadenylate-binding protein                                   | 4.8204      | <0.0001 |
| AFLA_033100 | B8N3Y7     | Phosphatidylinositol transporter, putative                      | 4.8118      | <0.0001 |
| AFLA_126870 | B8NMS4     | Uncharacterized protein                                         | 4.7704      | 0.0003  |
| AFLA_132540 | B8NH30     | Thioredoxin                                                     | 4.5661      | <0.0001 |
| AFLA_089270 | A0A0D9N5A3 | Basic region leucine zipper                                     | 4.3982      | 0.0004  |
| AFLA_082510 | B8MYW2     | TCTP family protein                                             | 4.3492      | 0.0001  |
| AFLA_091270 | B8NKG1     | Fumarate hydratase, putative                                    | 4.3014      | <0.0001 |
| AFLA_093660 | B8NKG2     | Solid-state culture expressed protein (Aos23), putative         | 4.2034      | <0.0001 |
| AFLA_112910 | B8N9Z5     | Uncharacterized protein                                         | 4.0491      | 0.0001  |
| AFLA_133920 | B8NFW3     | Acyl CoA binding protein family                                 | 3.9799      | <0.0001 |
| AFLA_111100 | B8N9G4     | Mitochondrial peroxiredoxin Prx1, putative                      | 3.8786      | <0.0001 |
| AFLA_006520 | A0A0D9N6X4 | Scd6-like Sm domain protein                                     | 3.8574      | 0.0016  |
| AFLA_135540 | B8NHE9     | ATP synthase oligomycin sensitivity conferral protein, putative | 3.8065      | <0.0001 |
| AFLA_094630 | B8NM07     | Triosephosphate isomerase                                       | 3.7901      | <0.0001 |
| AFLA_022470 | B8N5B9     | Adenylate kinase                                                | 3.7778      | <0.0001 |
| AFLA_043390 | B8NAW4     | Hsp70 chaperone (BiP), putative                                 | 3.7297      | <0.0001 |
| AFLA_012200 | B8NYQ1     | Hsp70 chaperone (HscA), putative                                | 3.7234      | <0.0001 |
| AFLA_006300 | B8NQF0     | Nucleoside diphosphate kinase                                   | 3.6605      | <0.0001 |
| AFLA_035620 | B8N4E9     | Hsp70 chaperone BiP/Kar2, putative                              | 3.6524      | <0.0001 |
| AFLA_004950 | B8NQA4     | Cytochrome c oxidase subunit Va, putative                       | 3.5150      | <0.0001 |
| AFLA_035510 | A0A0D9N8A2 | KH domain protein                                               | 3.5028      | <0.0001 |
| AFLA_073480 | B8MW01     | Tropomyosin, putative                                           | 3.4259      | 0.0003  |
| AFLA_057670 | B8NE36     | Neutral protease 2                                              | 3.3915      | 0.0002  |
| AFLA_071010 | B8NK52     | Heat shock protein (Sti1), putative                             | 3.3882      | <0.0001 |
| AFLA_023500 | A0A0D9N0I0 | Ser-Thr-rich glycosyl-phosphatidyl-inositol-anchored membrane   | 3.3598      | 0.0005  |
| AFLA_029390 | B8N174     | HMG box protein, putative                                       | 3.3548      | 0.0007  |
| AFLA_099000 | Q8NK14     | Cu,Zn-superoxide dismutase (Fragment)                           | 3.2952      | 0.0012  |
| AFLA_037490 | B8N2H4     | Eukaryotic translation initiation factor 3 subunit J            | 3.2690      | <0.0001 |

**Table S2.** Cont.

| Gene ID     | Uniprot ID | Annotation                                                     | Fold Change | q-value |
|-------------|------------|----------------------------------------------------------------|-------------|---------|
| AFLA_022380 | B8N5B0     | Molecular chaperone Hsp70                                      | 3.2121      | <0.0001 |
| AFLA_054750 | B8ND04     | Malate dehydrogenase, NAD-dependent                            | 3.2016      | <0.0001 |
| AFLA_117850 | B8NW38     | RPEL repeat protein                                            | 3.1798      | 0.0024  |
| AFLA_002560 | B8NPV3     | 60S ribosomal protein L37a                                     | 3.1527      | 0.0015  |
| AFLA_036640 | B8N4G1     | PH domain protein                                              | 3.1291      | <0.0001 |
| AFLA_021820 | B8N7G0     | Nuclear movement protein NudC                                  | 3.0902      | <0.0001 |
| AFLA_007700 | B8NXF1     | Uncharacterized protein                                        | 3.0378      | <0.0001 |
| AFLA_025990 | B8N0R4     | Clathrin light chain                                           | 3.0098      | 0.0003  |
| AFLA_051770 | B8NSY4     | Thioredoxin reductase                                          | 3.0022      | <0.0001 |
| AFLA_087950 | B8MWA5     | Isocitrate dehydrogenase LysB                                  | 2.9508      | <0.0001 |
| AFLA_067940 | B8NIK7     | Uncharacterized protein                                        | 2.9382      | 0.0002  |
| AFLA_139300 | Q5VD95     | Ver-1                                                          | 2.9378      | <0.0001 |
| AFLA_056260 | B8ND65     | Nascent polypeptide-associated complex (NAC) subunit, putative | 2.8759      | 0.0003  |
| AFLA_076450 | B8MX58     | Electron transfer flavoprotein alpha subunit, putative         | 2.8451      | 0.0004  |
| AFLA_041260 | B8NCF1     | Ribosome associated DnaJ chaperone Zuotin, putative            | 2.8222      | <0.0001 |
| AFLA_086710 | B8N031     | Inorganic diphosphatase, putative                              | 2.7256      | <0.0001 |
| AFLA_002670 | B8NPW4     | Curved DNA-binding protein (42 kDa protein)                    | 2.6656      | <0.0001 |
| AFLA_032890 | B8N1Y5     | Uncharacterized protein                                        | 2.6651      | <0.0001 |
| AFLA_031960 | B8N3W2     | 40S ribosomal protein S7e                                      | 2.5888      | <0.0001 |
| AFLA_012160 | B8NYP6     | Acetyl-CoA acetyltransferase, putative                         | 2.5492      | 0.0001  |
| AFLA_078380 | B8MXQ1     | Acetyl-coA hydrolase Ach1, putative                            | 2.5228      | <0.0001 |
| AFLA_135200 | B8NHB5     | Uncharacterized protein                                        | 2.5227      | 0.0005  |
| AFLA_069010 | B8NJU1     | S-adenosylmethionine synthase                                  | 2.4799      | <0.0001 |
| AFLA_128280 | B8NP45     | M protein repeat protein                                       | 2.4778      | <0.0001 |
| AFLA_056850 | B8NDC4     | Electron transfer flavoprotein, beta subunit, putative         | 2.4733      | <0.0001 |
| AFLA_122720 | A0A0D9MR79 | Variant SH3 domain protein                                     | 2.4677      | <0.0001 |
| AFLA_022270 | B8N599     | Uncharacterized protein                                        | 2.4341      | <0.0001 |
| AFLA_030180 | B8N1F3     | Protein mitochondrial targeting protein (Mas1), putative       | 2.4320      | 0.0004  |
| AFLA_033620 | B8N439     | RNA binding protein, putative                                  | 2.4194      | 0.0007  |
| AFLA_068840 | B8NJS4     | Aminomethyltransferase                                         | 2.3874      | <0.0001 |
| AFLA_113000 | B8NA04     | Integral ER membrane protein Scs2, putative                    | 2.3700      | 0.0003  |
| AFLA_014930 | B8N6I0     | Cofactor for methionyl- and glutamyl-tRNA synthetase, putative | 2.3539      | <0.0001 |
| AFLA_091030 | B8NLH6     | Uncharacterized protein                                        | 2.3419      | <0.0001 |
| AFLA_061880 | B8NEJ0     | Pyridoxine biosynthesis protein                                | 2.3126      | <0.0001 |
| AFLA_120630 | B8NWM6     | Glyoxylate/hydroxypyruvate reductase, putative                 | 2.3036      | <0.0001 |
| N/A         | A0A0D9MZ11 | ATP synthase D chain mitochondrial ATP5H                       | 2.2920      | <0.0001 |
| AFLA_080390 | B8MYA2     | 6-phosphogluconolactonase, putative                            | 2.2903      | 0.0006  |
| AFLA_119660 | B8NWC9     | ATP synthase subunit beta                                      | 2.2785      | <0.0001 |
| AFLA_088570 | B8MWG7     | Uncharacterized protein                                        | 2.2651      | 0.0015  |
| AFLA_093280 | B8NKS4     | Disulfide isomerase (TigA), putative                           | 2.2141      | <0.0001 |
| AFLA_131280 | B8NFM7     | Actin cortical patch assembly protein Pan1, putative           | 2.1482      | <0.0001 |
| AFLA_048610 | B8NSJ8     | Succinyl-CoA synthetase alpha subunit, putative                | 2.0954      | <0.0001 |
| AFLA_052400 | B8NS09     | Isocitrate lyase                                               | 2.0952      | <0.0001 |
| AFLA_026470 | B8NOW2     | Aspartate aminotransferase                                     | 2.0949      | <0.0001 |
| AFLA_095570 | B8NMC5     | RNA annealing protein Yra1, putative                           | 2.0178      | 0.0006  |

**Table S2.** Cont.

| Gene ID     | Uniprot ID | Annotation                                                        | Fold Change | q-value |
|-------------|------------|-------------------------------------------------------------------|-------------|---------|
| AFLA_080930 | B8MYF5     | EF hand domain protein                                            | 1.9783      | <0.0001 |
| AFLA_007000 | B8NQL8     | Ubiquinol-cytochrome C reductase complex core protein 2           | 1.9670      | 0.0002  |
| AFLA_060260 | B8NEB7     | Heat shock protein Hsp30/Hsp42, putative                          | 1.9434      | 0.0001  |
| AFLA_040120 | B8NAG7     | Flavohemoprotein                                                  | 1.9342      | <0.0001 |
| AFLA_007020 | B8NRD5     | Citrate synthase                                                  | 1.9242      | <0.0001 |
| AFLA_034050 | B8N211     | Aconitate hydratase, mitochondrial                                | 1.8774      | <0.0001 |
| AFLA_025980 | B8N0R3     | Hsp90 co-chaperone Cdc37                                          | 1.8733      | 0.0008  |
| AFLA_134120 | B8NG73     | Orotate phosphoribosyltransferase                                 | 1.8351      | 0.0031  |
| AFLA_134340 | B8NG94     | BAR domain protein                                                | 1.8252      | 0.0006  |
| AFLA_127390 | B8NNC8     | Proteasome regulatory particle subunit Rpt5, putative             | 1.8044      | <0.0001 |
| AFLA_042700 | A0A0D9MTF9 | RNA recognition motif                                             | 1.8035      | 0.0001  |
| AFLA_099650 | B8NTN4     | Woronin body major protein, putative                              | 1.7619      | <0.0001 |
| AFLA_029440 | B8N179     | NADH-cytochrome b5 reductase                                      | 1.7422      | 0.0003  |
| AFLA_032870 | B8N1Y3     | cAMP-dependent protein kinase regulatory subunit                  | 1.6347      | 0.0026  |
| AFLA_022480 | B8N5C0     | 26S proteasome regulatory particle subunit Rpn8, putative         | 1.6345      | 0.0018  |
| AFLA_035540 | B8N4E1     | Signal transducing adapter molecule, putative                     | 1.6233      | 0.0010  |
| AFLA_045330 | B8NBF8     | Eukaryotic translation initiation factor subunit eIF-4F, putative | 1.4860      | 0.0004  |
| AFLA_029850 | B8N1C0     | Cysteine-rich secreted protein                                    | 0.9015      | <0.0001 |
| AFLA_097750 | C5H8J2     | SspA                                                              | 0.7322      | 0.0007  |
| AFLA_109320 | B8N8Y6     | 3-hydroxyisobutyrate dehydrogenase                                | 0.5787      | 0.0031  |
| AFLA_106350 | B8N841     | ATP citrate lyase subunit (Acl), putative                         | 0.5678      | <0.0001 |
| AFLA_044090 | B8NB34     | Uricase                                                           | 0.5153      | 0.0034  |
| AFLA_092640 | B8NLP8     | Alkaline phosphatase                                              | 0.5070      | 0.0014  |
| AFLA_070990 | B8NK50     | UTP-glucose-1-phosphate uridylyltransferase Ugp1, putative        | 0.5061      | 0.0002  |
| AFLA_110260 | B8N980     | Flavin-binding monooxygenase-like protein                         | 0.5005      | 0.0007  |
| AFLA_122180 | B8NX31     | Uncharacterized protein                                           | 0.4788      | 0.0024  |
| AFLA_117760 | B8NVT9     | Phytase, putative                                                 | 0.4773      | <0.0001 |
| AFLA_056170 | B8NDX6     | Catalase                                                          | 0.4613      | 0.0002  |
| AFLA_133990 | B8NFX0     | Secretory pathway gdp dissociation inhibitor                      | 0.4509      | <0.0001 |
| AFLA_078650 | B8MXS8     | ATP synthase subunit alpha                                        | 0.4391      | <0.0001 |
| AFLA_124380 | A0A0D9N439 | Ricin-type beta-trefoil lectin domain-like protein                | 0.4300      | 0.0008  |
| AFLA_020380 | B8N500     | Stomatin family protein                                           | 0.4267      | 0.0004  |
| AFLA_069590 | B8NIT1     | Adenosylhomocysteinase                                            | 0.4243      | 0.0003  |
| AFLA_079480 | B8MY11     | Oligopeptidase family protein                                     | 0.4130      | 0.0008  |
| AFLA_050690 | B8NRS8     | Mitochondrial ADP,ATP carrier protein (Ant), putative             | 0.4082      | 0.0001  |
| AFLA_044820 | B8NBA7     | Glucose-6-phosphate isomerase                                     | 0.4071      | <0.0001 |
| AFLA_031570 | B8N3S3     | Pyruvate decarboxylase PdcA, putative                             | 0.4008      | <0.0001 |
| AFLA_083370 | B8MZ48     | Glutathione oxidoreductase Glr1, putative                         | 0.3978      | <0.0001 |
| AFLA_036110 | B8N2C6     | 4-hydroxyphenylpyruvate dioxygenase                               | 0.3894      | 0.0004  |
| AFLA_077860 | B8MXJ9     | Uncharacterized protein                                           | 0.3878      | 0.0006  |
| AFLA_038790 | B8NCH3     | Adenosine deaminase family protein                                | 0.3871      | 0.0004  |
| AFLA_112120 | B8N9R6     | Pyruvate carboxylase                                              | 0.3819      | <0.0001 |
| AFLA_028260 | B8N151     | Probable glucan 1,3-beta-glucosidase A                            | 0.3789      | <0.0001 |
| AFLA_060110 | B8NEA2     | Uncharacterized protein                                           | 0.3676      | 0.0001  |
| AFLA_027070 | B8N394     | Acetyl-coenzyme A synthetase                                      | 0.3552      | <0.0001 |



**Table S2.** Cont.

| Gene ID     | Uniprot ID | Annotation                                                  | Fold Change | q-value |
|-------------|------------|-------------------------------------------------------------|-------------|---------|
| AFLA_057770 | B8NE46     | Probable pectate lyase A                                    | 0.3498      | <0.0001 |
| AFLA_056350 | B8ND74     | 2-methylcitrate dehydratase, putative                       | 0.3473      | 0.0023  |
| AFLA_001890 | A0A0D9MRR2 | GMC oxidoreductase                                          | 0.3396      | 0.0006  |
| AFLA_034870 | A0A0D9N8E0 | Taurine catabolism dioxygenase TauD TfdA family protein     | 0.3376      | <0.0001 |
| AFLA_110600 | B8N9B4     | Aminopeptidase                                              | 0.3318      | <0.0001 |
| AFLA_078900 | B8MXV3     | Beta-hexosaminidase                                         | 0.3236      | <0.0001 |
| AFLA_128530 | B8NP70     | Delta-1-pyrroline-5-carboxylate dehydrogenase PrnC          | 0.3189      | 0.0005  |
| AFLA_017100 | A0A0D9MRY2 | Beta-galactosidase                                          | 0.3185      | <0.0001 |
| AFLA_046730 | B8NBU8     | Uncharacterized protein                                     | 0.3156      | 0.0002  |
| AFLA_125270 | A0A0D9MSQ9 | Uncharacterized protein                                     | 0.3106      | <0.0001 |
| AFLA_031760 | B8N3U2     | Glutaminase, putative                                       | 0.3012      | 0.0012  |
| AFLA_039410 | B8NCN4     | Cell wall serine-threonine-rich galactomannoprotein Mp1     | 0.3002      | <0.0001 |
| AFLA_086900 | B8N050     | Alpha-mannosidase                                           | 0.2894      | 0.0004  |
| AFLA_074520 | B8MWJ5     | Probable alpha-galactosidase A                              | 0.2726      | <0.0001 |
| AFLA_110690 | B8N9C3     | Cytochrome c peroxidase Ccp1, putative                      | 0.2689      | <0.0001 |
| AFLA_124500 | B8NML4     | Nitric oxide synthase, putative                             | 0.2678      | <0.0001 |
| AFLA_036440 | B8N2F9     | Alanine aminotransferase, putative                          | 0.2636      | <0.0001 |
| AFLA_101160 | B8NUR3     | 40S ribosomal protein S9                                    | 0.2544      | <0.0001 |
| AFLA_036070 | B8N2C2     | Maleylacetoacetate isomerase MaiA                           | 0.2498      | 0.0003  |
| AFLA_008990 | A0A0D9MP25 | Carboxypeptidase                                            | 0.2484      | <0.0001 |
| AFLA_103940 | B8NV99     | Glutamate carboxypeptidase, putative                        | 0.2475      | <0.0001 |
| AFLA_099220 | B8NUG0     | Uncharacterized protein                                     | 0.2439      | 0.0018  |
| AFLA_122110 | A0A0D9N4R3 | Peroxidase                                                  | 0.2412      | <0.0001 |
| AFLA_042090 | B8NCX4     | Fasciclin domain family protein                             | 0.2401      | <0.0001 |
| AFLA_036840 | B8N4I0     | 6-phosphogluconate dehydrogenase, decarboxylating           | 0.2376      | <0.0001 |
| AFLA_047350 | B8NC10     | Probable Xaa-Pro aminopeptidase pepP                        | 0.2373      | <0.0001 |
| AFLA_112470 | B8N9V1     | Cobalamin-independent methionine synthase MetH/D            | 0.2364      | <0.0001 |
| AFLA_133150 | B8NH91     | Catechol dioxygenase, putative                              | 0.2226      | 0.0008  |
| AFLA_090690 | B8NLE2     | Mycelial catalase Cat1                                      | 0.2178      | <0.0001 |
| AFLA_130150 | A0A0D9NA25 | Uncharacterized protein                                     | 0.2168      | <0.0001 |
| AFLA_029310 | B8N3M8     | Alcohol dehydrogenase, zinc-containing, putative            | 0.2022      | <0.0001 |
| AFLA_139480 | C9K205     | Dimethylallyl tryptophan synthase                           | 0.1989      | <0.0001 |
| AFLA_055060 | B8ND35     | NAD-dependent formate dehydrogenase AciA/Fdh                | 0.1975      | <0.0001 |
| AFLA_030140 | B8N1E9     | 60S acidic ribosomal protein P0                             | 0.1961      | 0.0003  |
| AFLA_055230 | B8ND52     | Actin Act1                                                  | 0.1924      | <0.0001 |
| AFLA_037960 | B8N2M1     | Glucosamine-fructose-6-phosphate aminotransferase           | 0.1894      | <0.0001 |
| AFLA_014520 | B8N5V9     | Multicopper oxidase, putative                               | 0.1838      | <0.0001 |
| AFLA_038530 | B8NC58     | Extracellular metalloproteinase mep                         | 0.1832      | <0.0001 |
| AFLA_101930 | B8NU22     | Succinate-semialdehyde dehydrogenase, putative              | 0.1668      | <0.0001 |
| AFLA_102010 | B8NU30     | Class V chitinase, putative                                 | 0.1642      | <0.0001 |
| AFLA_002090 | B8NQR5     | Extracellular serine carboxypeptidase, putative             | 0.1441      | 0.0007  |
| AFLA_055450 | B8NDQ4     | Translation elongation factor eEF-1 subunit gamma, putative | 0.1419      | <0.0001 |
| AFLA_025100 | B8N2Y6     | Glyceraldehyde-3-phosphate dehydrogenase                    | 0.1397      | <0.0001 |
| AFLA_110160 | B8N970     | Probable dipeptidyl peptidase 4                             | 0.1381      | 0.0007  |
| AFLA_076180 | B8MX31     | Uncharacterized protein                                     | 0.1368      | <0.0001 |

**Table S2.** Cont.

| Gene ID              | Uniprot ID | Annotation                                              | Fold Change | q-value |
|----------------------|------------|---------------------------------------------------------|-------------|---------|
| AFLA_136640          | B8NGN7     | Translation elongation factor EF-2 subunit, putative    | 0.1365      | <0.0001 |
| AFLA_026140          | B8N0S9     | Alpha-amylase                                           | 0.1321      | 0.0051  |
| AFLA_033400          | A0A0D9N9J1 | alpha-1,2-Mannosidase                                   | 0.1243      | 0.0008  |
| AFLA_021870          | A0A0D9MMH9 | Glucanase                                               | 0.1221      | <0.0001 |
| AFLA_108100          | B8N8L6     | Argininosuccinate synthase                              | 0.1211      | <0.0001 |
| AFLA_108790          | B8N8T4     | Aldehyde dehydrogenase AldA, putative                   | 0.1165      | <0.0001 |
| AFLA_025510          | B8N327     | GPI anchored protein, putative                          | 0.1109      | <0.0001 |
| AFLA_119040          | B8NVX6     | Muramidase, putative                                    | 0.1108      | 0.0002  |
| AFLA_006960          | B8NQL4     | Molecular chaperone and allergen Mod-E/Hsp90/Hsp1       | 0.1079      | <0.0001 |
| AFLA_027810          | A0A0D9MQC0 | Subtilase family protein                                | 0.0836      | <0.0001 |
| AFLA_051140          | A0A0D9MWN4 | Beta-glucosidase                                        | 0.0706      | <0.0001 |
| AFLA_139470          | B8NI10     | Beta-cyclopiazonate dehydrogenase                       | 0.0613      | <0.0001 |
| AFLA_045980          | A0A0D9N070 | Prolyl oligopeptidase family protein                    | 0.0585      | <0.0001 |
| AFLA_076170          | B8MX30     | Uncharacterized protein                                 | 0.0576      | <0.0001 |
| AFLA_070490          | B8NK00     | Uncharacterized protein                                 | 0.0511      | <0.0001 |
| AFLA_108410          | B8N8P6     | Dipeptidase                                             | 0.0441      | <0.0001 |
| AFLA_034640          | B8N270     | Peptide hydrolase                                       | 0.0418      | <0.0001 |
| <b>K54A 0 v 10mM</b> |            |                                                         |             |         |
| AFLA_112130          | A0A0D9MS17 | Hydrophobic surface binding protein A                   | 7.2344      | <0.0001 |
| AFLA_030880          | B8N1M3     | Uncharacterized protein                                 | 3.0305      | 0.0045  |
| AFLA_003440          | B8NQW0     | Translation initiation factor 4B                        | 2.8918      | <0.0001 |
| AFLA_007700          | B8NXF1     | Uncharacterized protein                                 | 2.7634      | 0.0002  |
| AFLA_133920          | B8NFW3     | Acyl CoA binding protein family                         | 2.2300      | <0.0001 |
| AFLA_031780          | B8N3U4     | Telomere and ribosome associated protein Stm1, putative | 2.1348      | 0.0002  |
| AFLA_057240          | A0A0D9MQY5 | RNA recognition motif                                   | 1.9996      | <0.0001 |
| AFLA_097190          | B8NU47     | Uncharacterized protein                                 | 1.9056      | <0.0001 |
| AFLA_039410          | B8NCN4     | Cell wall serine-threonine-rich galactomannoprotein Mp1 | 1.4781      | <0.0001 |
| AFLA_044620          | B8NB87     | Mitochondrial Hsp70 chaperone (Ssc70), putative         | 1.3370      | <0.0001 |
| AFLA_004950          | B8NQA4     | Cytochrome c oxidase subunit Va, putative               | 1.3313      | 0.0003  |
| AFLA_071350          | B8NJ18     | UDP-N-acetylglucosamine pyrophosphorylase               | 0.6057      | 0.0003  |
| AFLA_124500          | B8NML4     | Nitric oxide synthase, putative                         | 0.5997      | 0.0007  |
| AFLA_078650          | B8MXS8     | ATP synthase subunit alpha                              | 0.5895      | 0.0002  |
| AFLA_025100          | B8N2Y6     | Glyceraldehyde-3-phosphate dehydrogenase                | 0.5114      | <0.0001 |
| AFLA_042090          | B8NCX4     | Fasciclin domain family protein                         | 0.5080      | <0.0001 |
| AFLA_122110          | A0A0D9N4R3 | Peroxidase                                              | 0.5028      | 0.0001  |
| AFLA_101160          | B8NUR3     | 40S ribosomal protein S9                                | 0.5001      | 0.0012  |
| AFLA_055060          | B8ND35     | NAD-dependent formate dehydrogenase AciA/Fdh            | 0.4053      | <0.0001 |
| AFLA_108410          | B8N8P6     | Dipeptidase                                             | 0.3654      | <0.0001 |
| AFLA_108790          | B8N8T4     | Aldehyde dehydrogenase AldA, putative                   | 0.3300      | <0.0001 |
| AFLA_045980          | A0A0D9N070 | Prolyl oligopeptidase family protein                    | 0.2662      | <0.0001 |

**Table S3.** Biological function GO terms enriched among DEPs in *A. flavus* isolates in response to oxidative stress.

| GO Term    | Name                                                               | Result Freq. | log <sub>10</sub> p |
|------------|--------------------------------------------------------------------|--------------|---------------------|
|            | <b>AF13 0 v 10mM</b>                                               |              |                     |
| GO:0006457 | protein folding                                                    | 0.0090       | -5.3444             |
| GO:0005975 | carbohydrate metabolic process                                     | 0.0526       | -3.7034             |
| GO:1901575 | organic substance catabolic process                                | 0.0461       | -2.3419             |
| GO:0009056 | catabolic process                                                  | 0.0482       | -2.251              |
| GO:0000387 | spliceosomal snRNP assembly                                        | 0.0005       | -2.152              |
| GO:0000244 | spliceosomal tri-snRNP complex assembly                            | 0.0001       | -2.152              |
| GO:0006809 | nitric oxide biosynthetic process                                  | 0.0002       | -2.152              |
| GO:1903409 | reactive oxygen species biosynthetic process                       | 0.0002       | -2.152              |
| GO:0042026 | protein refolding                                                  | 0.0007       | -2.152              |
| GO:0019427 | acetyl-CoA biosynthetic process from acetate                       | 0.0003       | -2.152              |
| GO:0019551 | glutamate catabolic process to 2-oxoglutarate                      | 0.0002       | -2.152              |
| GO:0043648 | dicarboxylic acid metabolic process                                | 0.0102       | -2.107              |
| GO:0032940 | secretion by cell                                                  | 0.0076       | -2.107              |
| GO:0046903 | secretion                                                          | 0.0081       | -2.107              |
| GO:0006403 | RNA localization                                                   | 0.0012       | -2.0851             |
| GO:0006979 | response to oxidative stress                                       | 0.0058       | -2.043              |
| GO:1901071 | glucosamine-containing compound metabolic process                  | 0.0013       | -2.043              |
| GO:0007010 | cytoskeleton organization                                          | 0.0079       | -2.0076             |
| GO:0034250 | positive regulation of cellular amide metabolic process            | 0.0009       | -1.9767             |
| GO:0045727 | positive regulation of translation                                 | 0.0008       | -1.9767             |
| GO:0006452 | translational frameshifting                                        | 0.0002       | -1.9767             |
| GO:0043243 | positive regulation of protein complex disassembly                 | 0.0002       | -1.9767             |
| GO:0051017 | actin filament bundle assembly                                     | 0.0005       | -1.9767             |
| GO:0051083 | 'de novo' cotranslational protein folding                          | 0.0000       | -1.9767             |
| GO:0006106 | fumarate metabolic process                                         | 0.0005       | -1.9767             |
| GO:0009414 | response to water deprivation                                      | 0.0002       | -1.9767             |
| GO:0006100 | (obsolete) tricarboxylic acid cycle intermediate metabolic process | 0.0014       | -1.9767             |
| GO:0006022 | aminoglycan metabolic process                                      | 0.0088       | -1.965              |
| GO:0006040 | amino sugar metabolic process                                      | 0.0024       | -1.965              |
| GO:0008612 | peptidyl-lysine modification to peptidyl-hypusine                  | 0.0002       | -1.8525             |
| GO:0006458 | 'de novo' protein folding                                          | 0.0003       | -1.8525             |
| GO:0006972 | hyperosmotic response                                              | 0.0001       | -1.8525             |
| GO:2001057 | reactive nitrogen species metabolic process                        | 0.0012       | -1.8525             |
| GO:0006108 | malate metabolic process                                           | 0.0009       | -1.7563             |
| GO:0006103 | 2-oxoglutarate metabolic process                                   | 0.0002       | -1.7563             |
| GO:0001101 | response to acid chemical                                          | 0.0012       | -1.7563             |
| GO:0008298 | intracellular mRNA localization                                    | 0.0002       | -1.7563             |
| GO:0051130 | positive regulation of cellular component organization             | 0.0037       | -1.6779             |
| GO:0030029 | actin filament-based process                                       | 0.0040       | -1.6129             |
| GO:0006083 | acetate metabolic process                                          | 0.0005       | -1.6117             |
| GO:0008150 | biological_process                                                 | 1.0000       | -1.5823             |
| GO:0044238 | primary metabolic process                                          | 0.5374       | -1.5713             |
| GO:0022607 | cellular component assembly                                        | 0.0248       | -1.5436             |

**Table S3. Cont.**

| <b>GO Term</b>           | <b>Name</b>                                                              | <b>Result Freq.</b> | <b>log<sub>10</sub> p</b> |
|--------------------------|--------------------------------------------------------------------------|---------------------|---------------------------|
| GO:0071704               | organic substance metabolic process                                      | 0.5836              | -1.5154                   |
| GO:0030865               | cortical cytoskeleton organization                                       | 0.0004              | -1.504                    |
| GO:0044396               | actin cortical patch organization                                        | 0.0001              | -1.504                    |
| GO:0072593               | reactive oxygen species metabolic process                                | 0.0028              | -1.504                    |
| GO:0009408               | response to heat                                                         | 0.0017              | -1.504                    |
| GO:0043649               | dicarboxylic acid catabolic process                                      | 0.0004              | -1.459                    |
| GO:0010035               | response to inorganic substance                                          | 0.0032              | -1.459                    |
| GO:1901700               | response to oxygen-containing compound                                   | 0.0050              | -1.4183                   |
| GO:0051646               | mitochondrion localization                                               | 0.0003              | -1.4183                   |
| GO:0007155               | cell adhesion                                                            | 0.0054              | -1.3158                   |
| GO:0022610               | biological adhesion                                                      | 0.0055              | -1.3158                   |
| <b>AF13 0 v 25mM</b>     |                                                                          |                     |                           |
| GO:1901135               | carbohydrate derivative metabolic process                                | 0.0632              | -2.5371                   |
| GO:0006048               | UDP-N-acetylglucosamine biosynthetic process                             | 0.0003              | -2.5338                   |
| GO:0015980               | energy derivation by oxidation of organic compounds                      | 0.0118              | -2.4489                   |
| GO:0006091               | generation of precursor metabolites and energy                           | 0.0194              | -2.2363                   |
| GO:0019693               | ribose phosphate metabolic process                                       | 0.0303              | -2.2158                   |
| GO:0006012               | galactose metabolic process                                              | 0.0011              | -2.0578                   |
| GO:0044710               | single-organism metabolic process                                        | 0.3168              | -2.0319                   |
| GO:0009225               | nucleotide-sugar metabolic process                                       | 0.0025              | -1.971                    |
| GO:0090662               | ATP hydrolysis coupled transmembrane transport                           | 0.0100              | -1.8092                   |
| GO:0015991               | ATP hydrolysis coupled proton transport                                  | 0.0016              | -1.8092                   |
| GO:0006113               | fermentation                                                             | 0.0002              | -1.783                    |
| GO:0019682               | glyceraldehyde-3-phosphate metabolic process                             | 0.0044              | -1.7351                   |
| GO:0051156               | glucose 6-phosphate metabolic process                                    | 0.0032              | -1.713                    |
| GO:0055086               | nucleobase-containing small molecule metabolic process                   | 0.0492              | -1.6893                   |
| GO:0006739               | NADP metabolic process                                                   | 0.0036              | -1.6529                   |
| GO:0044237               | cellular metabolic process                                               | 0.5306              | -1.5973                   |
| GO:0019637               | organophosphate metabolic process                                        | 0.0615              | -1.5464                   |
| GO:0044699               | single-organism process                                                  | 0.4657              | -1.5314                   |
| GO:0009142               | nucleoside triphosphate biosynthetic process                             | 0.0065              | -1.4979                   |
| GO:0006818               | hydrogen transport                                                       | 0.0115              | -1.4851                   |
| GO:0006979               | response to oxidative stress                                             | 0.0058              | -1.4157                   |
| GO:0006950               | response to stress                                                       | 0.0458              | -1.4069                   |
| GO:0006040               | amino sugar metabolic process                                            | 0.0024              | -1.375                    |
| GO:0006081               | cellular aldehyde metabolic process                                      | 0.0075              | -1.3206                   |
| GO:1901659               | glycosyl compound biosynthetic process                                   | 0.0147              | -1.3206                   |
| <b>NRRL3357 0 v 10mM</b> |                                                                          |                     |                           |
| GO:0006457               | protein folding                                                          | 0.0090              | -7.445                    |
| GO:0006616               | SRP-dependent cotranslational protein targeting to membrane, translocati | 0.0001              | -3.6819                   |
| GO:0006094               | gluconeogenesis                                                          | 0.0026              | -3.0022                   |
| GO:0033036               | macromolecule localization                                               | 0.0303              | -2.9823                   |
| GO:0006628               | (obsolete) mitochondrial translocation                                   | 0.0014              | -2.8592                   |
| GO:0070972               | protein localization to endoplasmic reticulum                            | 0.0019              | -2.8592                   |
| GO:0071806               | protein transmembrane transport                                          | 0.0053              | -2.7758                   |

**Table S3.** Cont.

| <b>GO Term</b> | <b>Name</b>                                                                | <b>Result Freq.</b> | <b>log<sub>10</sub> p</b> |
|----------------|----------------------------------------------------------------------------|---------------------|---------------------------|
| GO:0065002     | intracellular protein transmembrane transport                              | 0.0028              | -2.7758                   |
| GO:0006099     | tricarboxylic acid cycle                                                   | 0.0047              | -2.6305                   |
| GO:0072350     | tricarboxylic acid metabolic process                                       | 0.0050              | -2.5663                   |
| GO:0051641     | cellular localization                                                      | 0.0204              | -2.5491                   |
| GO:0045454     | cell redox homeostasis                                                     | 0.0086              | -2.5068                   |
| GO:0006091     | generation of precursor metabolites and energy                             | 0.0194              | -2.3309                   |
| GO:0072521     | purine-containing compound metabolic process                               | 0.0267              | -2.3211                   |
| GO:0043648     | dicarboxylic acid metabolic process                                        | 0.0102              | -2.3043                   |
| GO:0042026     | protein refolding                                                          | 0.0007              | -2.2522                   |
| GO:0007571     | age-dependent general metabolic decline                                    | 0.0001              | -2.2522                   |
| GO:0001321     | age-dependent general metabolic decline involved in replicative cell aging | 0.0000              | -2.2522                   |
| GO:0006100     | (obsolete) tricarboxylic acid cycle intermediate metabolic process         | 0.0014              | -2.0767                   |
| GO:0006740     | NADPH regeneration                                                         | 0.0001              | -2.0767                   |
| GO:0071702     | organic substance transport                                                | 0.0498              | -2.0668                   |
| GO:0016051     | carbohydrate biosynthetic process                                          | 0.0108              | -2.0074                   |
| GO:0044283     | small molecule biosynthetic process                                        | 0.0568              | -1.9953                   |
| GO:0044281     | small molecule metabolic process                                           | 0.1514              | -1.9756                   |
| GO:0000741     | karyogamy                                                                  | 0.0001              | -1.9524                   |
| GO:0009117     | nucleotide metabolic process                                               | 0.0417              | -1.9504                   |
| GO:0008150     | biological_process                                                         | 1.0000              | -1.9349                   |
| GO:0072522     | purine-containing compound biosynthetic process                            | 0.0150              | -1.8789                   |
| GO:0006108     | malate metabolic process                                                   | 0.0009              | -1.856                    |
| GO:0061024     | membrane organization                                                      | 0.0076              | -1.7462                   |
| GO:0072524     | pyridine-containing compound metabolic process                             | 0.0135              | -1.7352                   |
| GO:0006733     | oxidoreduction coenzyme metabolic process                                  | 0.0127              | -1.6824                   |
| GO:0019541     | propionate metabolic process                                               | 0.0003              | -1.6536                   |
| GO:1901566     | organonitrogen compound biosynthetic process                               | 0.1406              | -1.6262                   |
| GO:0016482     | cytosolic transport                                                        | 0.0008              | -1.6048                   |
| GO:0044396     | actin cortical patch organization                                          | 0.0001              | -1.6031                   |
| GO:0006446     | regulation of translational initiation                                     | 0.0009              | -1.6031                   |
| GO:0030866     | cortical actin cytoskeleton organization                                   | 0.0003              | -1.6031                   |
| GO:0046459     | short-chain fatty acid metabolic process                                   | 0.0003              | -1.6031                   |
| GO:0030865     | cortical cytoskeleton organization                                         | 0.0004              | -1.6031                   |
| GO:0055086     | nucleobase-containing small molecule metabolic process                     | 0.0492              | -1.566                    |
| GO:0006986     | response to unfolded protein                                               | 0.0004              | -1.5579                   |
| GO:0009113     | purine nucleobase biosynthetic process                                     | 0.0012              | -1.5579                   |
| GO:0035966     | response to topologically incorrect protein                                | 0.0005              | -1.5171                   |
| GO:0044711     | single-organism biosynthetic process                                       | 0.1086              | -1.5168                   |
| GO:0015914     | phospholipid transport                                                     | 0.0008              | -1.4799                   |
| GO:1901564     | organonitrogen compound metabolic process                                  | 0.1789              | -1.4506                   |
| GO:0007568     | aging                                                                      | 0.0009              | -1.4457                   |
| GO:0019538     | protein metabolic process                                                  | 0.1849              | -1.4162                   |
| GO:0034308     | primary alcohol metabolic process                                          | 0.0005              | -1.3847                   |
| GO:0006537     | glutamate biosynthetic process                                             | 0.0009              | -1.3847                   |
| GO:0006067     | ethanol metabolic process                                                  | 0.0002              | -1.3847                   |

**Table S3. Cont.**

| <b>GO Term</b>           | <b>Name</b>                                            | <b>Result Freq.</b> | <b>log<sub>10</sub> p</b> |
|--------------------------|--------------------------------------------------------|---------------------|---------------------------|
| GO:0019637               | organophosphate metabolic process                      | 0.0615              | -1.3732                   |
| GO:0090662               | ATP hydrolysis coupled transmembrane transport         | 0.0100              | -1.3573                   |
| GO:0015991               | ATP hydrolysis coupled proton transport                | 0.0016              | -1.3573                   |
| GO:0006414               | translational elongation                               | 0.0078              | -1.3573                   |
| GO:0006508               | proteolysis                                            | 0.0522              | -1.3097                   |
| GO:0006893               | Golgi to plasma membrane transport                     | 0.0003              | -1.3073                   |
| <b>NRRL3357 0 v 20mM</b> |                                                        |                     |                           |
| GO:1901564               | organonitrogen compound metabolic process              | 0.1789              | -9.6479                   |
| GO:0044281               | small molecule metabolic process                       | 0.1514              | -9.0182                   |
| GO:0071704               | organic substance metabolic process                    | 0.5836              | -7.7614                   |
| GO:0006979               | response to oxidative stress                           | 0.0058              | -7.4622                   |
| GO:0006457               | protein folding                                        | 0.0090              | -7.3287                   |
| GO:0043648               | dicarboxylic acid metabolic process                    | 0.0102              | -6.6855                   |
| GO:0006082               | organic acid metabolic process                         | 0.0909              | -6.2381                   |
| GO:0044238               | primary metabolic process                              | 0.5374              | -6.1893                   |
| GO:0055086               | nucleobase-containing small molecule metabolic process | 0.0492              | -5.5771                   |
| GO:0072350               | tricarboxylic acid metabolic process                   | 0.0050              | -5.4918                   |
| GO:0006732               | coenzyme metabolic process                             | 0.0311              | -5.3998                   |
| GO:0072524               | pyridine-containing compound metabolic process         | 0.0135              | -5.2466                   |
| GO:0019318               | hexose metabolic process                               | 0.0064              | -4.9098                   |
| GO:0006091               | generation of precursor metabolites and energy         | 0.0194              | -4.8957                   |
| GO:0072521               | purine-containing compound metabolic process           | 0.0267              | -4.8621                   |
| GO:0009117               | nucleotide metabolic process                           | 0.0417              | -4.838                    |
| GO:0009405               | pathogenesis                                           | 0.0010              | -4.7576                   |
| GO:0006536               | glutamate metabolic process                            | 0.0020              | -4.7089                   |
| GO:1901605               | alpha-amino acid metabolic process                     | 0.0363              | -4.7038                   |
| GO:0051186               | cofactor metabolic process                             | 0.0399              | -4.6503                   |
| GO:0006099               | tricarboxylic acid cycle                               | 0.0047              | -4.6192                   |
| GO:1901566               | organonitrogen compound biosynthetic process           | 0.1406              | -4.3131                   |
| GO:0044710               | single-organism metabolic process                      | 0.3168              | -4.3005                   |
| GO:0045454               | cell redox homeostasis                                 | 0.0086              | -4.2931                   |
| GO:0005975               | carbohydrate metabolic process                         | 0.0526              | -4.2293                   |
| GO:1901575               | organic substance catabolic process                    | 0.0461              | -4.1537                   |
| GO:0044237               | cellular metabolic process                             | 0.5306              | -4.0034                   |
| GO:0006807               | nitrogen compound metabolic process                    | 0.3874              | -3.9359                   |
| GO:0009056               | catabolic process                                      | 0.0482              | -3.8822                   |
| GO:1901135               | carbohydrate derivative metabolic process              | 0.0632              | -3.8544                   |
| GO:0006508               | proteolysis                                            | 0.0522              | -3.769                    |
| GO:1901657               | glycosyl compound metabolic process                    | 0.0296              | -3.7326                   |
| GO:0006950               | response to stress                                     | 0.0458              | -3.6649                   |
| GO:0019637               | organophosphate metabolic process                      | 0.0615              | -3.5688                   |
| GO:0019538               | protein metabolic process                              | 0.1849              | -3.5413                   |
| GO:0008152               | metabolic process                                      | 0.7539              | -3.4523                   |
| GO:0006518               | peptide metabolic process                              | 0.0596              | -3.3196                   |
| GO:0006414               | translational elongation                               | 0.0078              | -3.3164                   |

**Table S3.** Cont.

| <b>GO Term</b> | <b>Name</b>                                                              | <b>Result Freq.</b> | <b>log<sub>10</sub> p</b> |
|----------------|--------------------------------------------------------------------------|---------------------|---------------------------|
| GO:0006083     | acetate metabolic process                                                | 0.0005              | -3.2122                   |
| GO:0044711     | single-organism biosynthetic process                                     | 0.1086              | -3.1117                   |
| GO:0006081     | cellular aldehyde metabolic process                                      | 0.0075              | -3.1109                   |
| GO:0019682     | glyceraldehyde-3-phosphate metabolic process                             | 0.0044              | -3.061                    |
| GO:0006790     | sulfur compound metabolic process                                        | 0.0182              | -3.0298                   |
| GO:0033036     | macromolecule localization                                               | 0.0303              | -3.0086                   |
| GO:0051156     | glucose 6-phosphate metabolic process                                    | 0.0032              | -2.9848                   |
| GO:0072593     | reactive oxygen species metabolic process                                | 0.0028              | -2.9319                   |
| GO:0006793     | phosphorus metabolic process                                             | 0.1351              | -2.9036                   |
| GO:0006403     | RNA localization                                                         | 0.0012              | -2.8409                   |
| GO:0043649     | dicarboxylic acid catabolic process                                      | 0.0004              | -2.8134                   |
| GO:0043603     | cellular amide metabolic process                                         | 0.0688              | -2.7522                   |
| GO:0006730     | one-carbon metabolic process                                             | 0.0033              | -2.7059                   |
| GO:0044283     | small molecule biosynthetic process                                      | 0.0568              | -2.6886                   |
| GO:0006100     | (obsolete) tricarboxylic acid cycle intermediate metabolic process       | 0.0014              | -2.6293                   |
| GO:0006106     | fumarate metabolic process                                               | 0.0005              | -2.6293                   |
| GO:0055114     | oxidation-reduction process                                              | 0.1506              | -2.6247                   |
| GO:0034248     | regulation of cellular amide metabolic process                           | 0.0070              | -2.5971                   |
| GO:0006417     | regulation of translation                                                | 0.0069              | -2.5971                   |
| GO:0008150     | biological_process                                                       | 1.0000              | -2.5961                   |
| GO:0010608     | posttranscriptional regulation of gene expression                        | 0.0072              | -2.4885                   |
| GO:0009066     | aspartate family amino acid metabolic process                            | 0.0083              | -2.4628                   |
| GO:0009987     | cellular process                                                         | 0.6378              | -2.4605                   |
| GO:0051704     | multi-organism process                                                   | 0.0075              | -2.4575                   |
| GO:0065008     | regulation of biological quality                                         | 0.0340              | -2.4073                   |
| GO:0032787     | monocarboxylic acid metabolic process                                    | 0.0249              | -2.3906                   |
| GO:0006637     | acyl-CoA metabolic process                                               | 0.0025              | -2.3554                   |
| GO:0035383     | thioester metabolic process                                              | 0.0025              | -2.3554                   |
| GO:0006537     | glutamate biosynthetic process                                           | 0.0009              | -2.3554                   |
| GO:0044723     | single-organism carbohydrate metabolic process                           | 0.0246              | -2.3085                   |
| GO:0000011     | vacuole inheritance                                                      | 0.0001              | -2.2826                   |
| GO:0051246     | regulation of protein metabolic process                                  | 0.0155              | -2.2478                   |
| GO:0008298     | intracellular mRNA localization                                          | 0.0002              | -2.2429                   |
| GO:0006108     | malate metabolic process                                                 | 0.0009              | -2.2429                   |
| GO:0006090     | pyruvate metabolic process                                               | 0.0082              | -2.1654                   |
| GO:0051641     | cellular localization                                                    | 0.0204              | -2.1066                   |
| GO:0007039     | protein catabolic process in the vacuole                                 | 0.0000              | -2.1026                   |
| GO:0006572     | tyrosine catabolic process                                               | 0.0001              | -2.1026                   |
| GO:0006570     | tyrosine metabolic process                                               | 0.0006              | -1.9834                   |
| GO:0006616     | SRP-dependent cotranslational protein targeting to membrane, translocati | 0.0001              | -1.9834                   |
| GO:0070727     | cellular macromolecule localization                                      | 0.0156              | -1.9718                   |
| GO:0009058     | biosynthetic process                                                     | 0.3161              | -1.9693                   |
| GO:1901576     | organic substance biosynthetic process                                   | 0.3037              | -1.9483                   |
| GO:0034641     | cellular nitrogen compound metabolic process                             | 0.3414              | -1.9398                   |
| GO:0048308     | organelle inheritance                                                    | 0.0003              | -1.9263                   |

**Table S3.** Cont.

| GO Term    | Name                                                                       | Result Freq. | $\log_{10} p$ |
|------------|----------------------------------------------------------------------------|--------------|---------------|
| GO:0006801 | superoxide metabolic process                                               | 0.0014       | -1.88         |
| GO:0019541 | propionate metabolic process                                               | 0.0003       | -1.88         |
| GO:0044763 | single-organism cellular process                                           | 0.2754       | -1.7941       |
| GO:0044396 | actin cortical patch organization                                          | 0.0001       | -1.7888       |
| GO:0030866 | cortical actin cytoskeleton organization                                   | 0.0003       | -1.7888       |
| GO:1902222 | erythrose 4-phosphate/phosphoenolpyruvate family amino acid catabolic p    | 0.0003       | -1.7888       |
| GO:0046459 | short-chain fatty acid metabolic process                                   | 0.0003       | -1.7888       |
| GO:0030865 | cortical cytoskeleton organization                                         | 0.0004       | -1.7888       |
| GO:0050896 | response to stimulus                                                       | 0.1221       | -1.7364       |
| GO:0010035 | response to inorganic substance                                            | 0.0032       | -1.7073       |
| GO:1902221 | erythrose 4-phosphate/phosphoenolpyruvate family amino acid metabolic      | 0.0008       | -1.7073       |
| GO:0006986 | response to unfolded protein                                               | 0.0004       | -1.7073       |
| GO:0072528 | pyrimidine-containing compound biosynthetic process                        | 0.0090       | -1.7015       |
| GO:0044267 | cellular protein metabolic process                                         | 0.1429       | -1.6907       |
| GO:0035966 | response to topologically incorrect protein                                | 0.0005       | -1.6339       |
| GO:0051646 | mitochondrion localization                                                 | 0.0003       | -1.6339       |
| GO:1902600 | hydrogen ion transmembrane transport                                       | 0.0102       | -1.6242       |
| GO:0016192 | vesicle-mediated transport                                                 | 0.0109       | -1.5817       |
| GO:0015914 | phospholipid transport                                                     | 0.0008       | -1.567        |
| GO:0072527 | pyrimidine-containing compound metabolic process                           | 0.0104       | -1.5526       |
| GO:0007033 | vacuole organization                                                       | 0.0010       | -1.5188       |
| GO:0044249 | cellular biosynthetic process                                              | 0.3005       | -1.5094       |
| GO:0006818 | hydrogen transport                                                         | 0.0115       | -1.4547       |
| GO:0009112 | nucleobase metabolic process                                               | 0.0048       | -1.4547       |
| GO:0042026 | protein refolding                                                          | 0.0007       | -1.4          |
| GO:0001887 | selenium compound metabolic process                                        | 0.0001       | -1.4          |
| GO:0007571 | age-dependent general metabolic decline                                    | 0.0001       | -1.4          |
| GO:0000052 | citrulline metabolic process                                               | 0.0002       | -1.4          |
| GO:0016259 | selenocysteine metabolic process                                           | 0.0004       | -1.4          |
| GO:0006011 | UDP-glucose metabolic process                                              | 0.0005       | -1.4          |
| GO:0050821 | protein stabilization                                                      | 0.0005       | -1.4          |
| GO:0000387 | spliceosomal snRNP assembly                                                | 0.0005       | -1.4          |
| GO:0031647 | regulation of protein stability                                            | 0.0007       | -1.4          |
| GO:0046039 | GTP metabolic process                                                      | 0.0010       | -1.4          |
| GO:0000053 | argininosuccinate metabolic process                                        | 0.0000       | -1.4          |
| GO:0001321 | age-dependent general metabolic decline involved in replicative cell aging | 0.0000       | -1.4          |
| GO:0000244 | spliceosomal tri-snRNP complex assembly                                    | 0.0001       | -1.4          |
| GO:0034308 | primary alcohol metabolic process                                          | 0.0005       | -1.397        |
| GO:0006067 | ethanol metabolic process                                                  | 0.0002       | -1.397        |
| GO:0022607 | cellular component assembly                                                | 0.0248       | -1.3685       |
| GO:0046903 | secretion                                                                  | 0.0081       | -1.3663       |
| GO:0090662 | ATP hydrolysis coupled transmembrane transport                             | 0.0100       | -1.3483       |
| GO:0044271 | cellular nitrogen compound biosynthetic process                            | 0.2250       | -1.3437       |
| GO:0006575 | cellular modified amino acid metabolic process                             | 0.0079       | -1.3226       |
| GO:0051168 | nuclear export                                                             | 0.0012       | -1.3119       |



**Table S3. Cont.**

| GO Term              | Name                                                   | Result Freq. | $\log_{10} p$ |
|----------------------|--------------------------------------------------------|--------------|---------------|
| <b>K54A 0 v 10mM</b> |                                                        |              |               |
| GO:1903409           | reactive oxygen species biosynthetic process           | 0.0002       | -2.3583       |
| GO:0006809           | nitric oxide biosynthetic process                      | 0.0002       | -2.3583       |
| GO:0009117           | nucleotide metabolic process                           | 0.0417       | -2.2536       |
| GO:0006048           | UDP-N-acetylglucosamine biosynthetic process           | 0.0003       | -2.1826       |
| GO:0015942           | formate metabolic process                              | 0.0007       | -2.1826       |
| GO:0042183           | formate catabolic process                              | 0.0001       | -2.1826       |
| GO:0006735           | NADH regeneration                                      | 0.0000       | -2.1826       |
| GO:2001057           | reactive nitrogen species metabolic process            | 0.0012       | -2.0581       |
| GO:0072524           | pyridine-containing compound metabolic process         | 0.0135       | -1.9404       |
| GO:0006733           | oxidoreduction coenzyme metabolic process              | 0.0127       | -1.8867       |
| GO:0006450           | regulation of translational fidelity                   | 0.0030       | -1.883        |
| GO:0055086           | nucleobase-containing small molecule metabolic process | 0.0492       | -1.8563       |
| GO:0006083           | acetate metabolic process                              | 0.0005       | -1.8165       |
| GO:0006734           | NADH metabolic process                                 | 0.0001       | -1.8165       |
| GO:0072593           | reactive oxygen species metabolic process              | 0.0028       | -1.7082       |
| GO:0019637           | organophosphate metabolic process                      | 0.0615       | -1.6548       |
| GO:0009225           | nucleotide-sugar metabolic process                     | 0.0025       | -1.622        |
| GO:0055114           | oxidation-reduction process                            | 0.1506       | -1.6206       |
| GO:0006091           | generation of precursor metabolites and energy         | 0.0194       | -1.5419       |
| GO:0072521           | purine-containing compound metabolic process           | 0.0267       | -1.5353       |
| GO:0007155           | cell adhesion                                          | 0.0054       | -1.5186       |
| GO:0022610           | biological adhesion                                    | 0.0055       | -1.5186       |
| GO:1901135           | carbohydrate derivative metabolic process              | 0.0632       | -1.5012       |
| GO:0034308           | primary alcohol metabolic process                      | 0.0005       | -1.4891       |
| GO:0006067           | ethanol metabolic process                              | 0.0002       | -1.4891       |
| GO:0090662           | ATP hydrolysis coupled transmembrane transport         | 0.0100       | -1.4615       |
| GO:0006094           | gluconeogenesis                                        | 0.0026       | -1.4615       |
| GO:0015991           | ATP hydrolysis coupled proton transport                | 0.0016       | -1.4615       |
| GO:1901657           | glycosyl compound metabolic process                    | 0.0296       | -1.4376       |
| GO:0034641           | cellular nitrogen compound metabolic process           | 0.3414       | -1.4263       |
| GO:0006628           | (obsolete) mitochondrial translocation                 | 0.0014       | -1.3882       |
| GO:0060249           | anatomical structure homeostasis                       | 0.0019       | -1.3664       |
| GO:0000723           | telomere maintenance                                   | 0.0013       | -1.3664       |
| GO:0032200           | telomere organization                                  | 0.0013       | -1.3664       |

**Table S4.** Cell localization GO terms enriched among DEPs in *A. flavus* isolates in response to oxidative stress.

| <b>GO Term</b>           | <b>Name</b>                                                    | <b>Result Freq.</b> | <b>log<sub>10</sub> p</b> |
|--------------------------|----------------------------------------------------------------|---------------------|---------------------------|
| <b>AF13 0 v 10mM</b>     |                                                                |                     |                           |
| GO:0005737               | cytoplasm                                                      | 0.2602              | -2.1202                   |
| GO:0005854               | nascent polypeptide-associated complex                         | 0.0000              | -1.9767                   |
| GO:0000783               | nuclear telomere cap complex                                   | 0.0001              | -1.9767                   |
| GO:0005823               | central plaque of spindle pole body                            | 0.0000              | -1.9767                   |
| GO:0009277               | fungus-type cell wall                                          | 0.0003              | -1.7835                   |
| GO:0000131               | incipient cellular bud site                                    | 0.0002              | -1.7563                   |
| GO:0005618               | cell wall                                                      | 0.0029              | -1.6869                   |
| GO:0030312               | external encapsulating structure                               | 0.0092              | -1.6013                   |
| GO:0008541               | proteasome regulatory particle, lid subcomplex                 | 0.0002              | -1.5544                   |
| GO:0005788               | endoplasmic reticulum lumen                                    | 0.0003              | -1.5544                   |
| GO:0044444               | cytoplasmic part                                               | 0.1266              | -1.4616                   |
| GO:0005934               | cellular bud tip                                               | 0.0002              | -1.4590                   |
| GO:0044450               | microtubule organizing center part                             | 0.0008              | -1.4590                   |
| GO:0005937               | mating projection                                              | 0.0004              | -1.3472                   |
| GO:0042995               | cell projection                                                | 0.0105              | -1.3472                   |
| <b>AF13 0 v 25mM</b>     |                                                                |                     |                           |
| GO:0044429               | mitochondrial part                                             | 0.0120              | -2.8686                   |
| GO:0005754               | mitochondrial proton-transporting ATP synthase, catalytic core | 0.0001              | -2.5338                   |
| GO:0045267               | proton-transporting ATP synthase, catalytic core               | 0.0001              | -2.5338                   |
| GO:0005737               | cytoplasm                                                      | 0.2602              | -2.3019                   |
| GO:0045277               | respiratory chain complex IV                                   | 0.0005              | -2.2333                   |
| GO:0098796               | membrane protein complex                                       | 0.0247              | -2.1446                   |
| GO:0005739               | mitochondrion                                                  | 0.0216              | -2.1286                   |
| GO:0070069               | cytochrome complex                                             | 0.0010              | -1.8988                   |
| GO:0070469               | respiratory chain                                              | 0.0030              | -1.7830                   |
| GO:0031967               | organelle envelope                                             | 0.0126              | -1.7779                   |
| GO:0031975               | envelope                                                       | 0.0232              | -1.7548                   |
| GO:0005625               | (obsolete) soluble fraction                                    | 0.0014              | -1.5533                   |
| GO:0016469               | proton-transporting two-sector ATPase complex                  | 0.0066              | -1.5247                   |
| GO:0031090               | organelle membrane                                             | 0.0200              | -1.3787                   |
| <b>NRRL3357 0 v 10mM</b> |                                                                |                     |                           |
| GO:0044444               | cytoplasmic part                                               | 0.1266              | -10.0571                  |
| GO:0005737               | cytoplasm                                                      | 0.2602              | -8.8752                   |
| GO:0005788               | endoplasmic reticulum lumen                                    | 0.0003              | -5.6430                   |
| GO:0044424               | intracellular part                                             | 0.3565              | -4.9227                   |
| GO:0005622               | intracellular                                                  | 0.4118              | -4.6872                   |
| GO:0044464               | cell part                                                      | 0.5239              | -3.9975                   |
| GO:0005623               | cell                                                           | 0.5355              | -3.9799                   |
| GO:0005829               | cytosol                                                        | 0.0255              | -3.6767                   |
| GO:0005575               | cellular_component                                             | 1.0000              | -3.2506                   |
| GO:0005739               | mitochondrion                                                  | 0.0216              | -2.9146                   |
| GO:0044432               | endoplasmic reticulum part                                     | 0.0082              | -2.6485                   |
| GO:0044422               | organelle part                                                 | 0.0943              | -2.4058                   |

**Table S4.** Cont.

| <b>GO Term</b>           | <b>Name</b>                                                    | <b>Result Freq.</b> | <b>log<sub>10</sub> p</b> |
|--------------------------|----------------------------------------------------------------|---------------------|---------------------------|
| GO:0044429               | mitochondrial part                                             | 0.0120              | -2.3397                   |
| GO:0043226               | organelle                                                      | 0.2079              | -2.1510                   |
| GO:0043229               | intracellular organelle                                        | 0.1992              | -2.1510                   |
| GO:0070013               | intracellular organelle lumen                                  | 0.0274              | -2.1334                   |
| GO:0005754               | mitochondrial proton-transporting ATP synthase, catalytic core | 0.0001              | -2.0767                   |
| GO:0045267               | proton-transporting ATP synthase, catalytic core               | 0.0001              | -2.0767                   |
| GO:0031974               | membrane-enclosed lumen                                        | 0.0274              | -2.0253                   |
| GO:0031090               | organelle membrane                                             | 0.0200              | -1.8333                   |
| GO:0030132               | clathrin coat of coated pit                                    | 0.0004              | -1.7111                   |
| GO:0005844               | polysome                                                       | 0.0004              | -1.6536                   |
| GO:0098589               | membrane region                                                | 0.0012              | -1.6031                   |
| GO:0043231               | intracellular membrane-bounded organelle                       | 0.1376              | -1.5814                   |
| GO:0012505               | endomembrane system                                            | 0.0281              | -1.5762                   |
| GO:0030529               | intracellular ribonucleoprotein complex                        | 0.0529              | -1.3848                   |
| GO:0030658               | transport vesicle membrane                                     | 0.0010              | -1.3847                   |
| <b>NRRL3357 0 v 20mM</b> |                                                                |                     |                           |
| GO:0005737               | cytoplasm                                                      | 0.2602              | -21.6660                  |
| GO:0044444               | cytoplasmic part                                               | 0.1266              | -18.9073                  |
| GO:0005829               | cytosol                                                        | 0.0255              | -11.7075                  |
| GO:0005739               | mitochondrion                                                  | 0.0216              | -10.1688                  |
| GO:0044424               | intracellular part                                             | 0.3565              | -9.7485                   |
| GO:0005622               | intracellular                                                  | 0.4118              | -8.8318                   |
| GO:0044464               | cell part                                                      | 0.5239              | -7.3714                   |
| GO:0005623               | cell                                                           | 0.5355              | -7.3042                   |
| GO:0044429               | mitochondrial part                                             | 0.0120              | -6.5324                   |
| GO:0031970               | organelle envelope lumen                                       | 0.0009              | -5.3095                   |
| GO:0005758               | mitochondrial intermembrane space                              | 0.0008              | -5.3095                   |
| GO:0031967               | organelle envelope                                             | 0.0126              | -4.3752                   |
| GO:0031975               | envelope                                                       | 0.0232              | -4.2429                   |
| GO:0005575               | cellular_component                                             | 1.0000              | -4.1326                   |
| GO:0044422               | organelle part                                                 | 0.0943              | -3.9772                   |
| GO:0044446               | intracellular organelle part                                   | 0.0894              | -3.9772                   |
| GO:0005840               | ribosome                                                       | 0.0420              | -3.1087                   |
| GO:0032991               | macromolecular complex                                         | 0.1401              | -2.9354                   |
| GO:0031974               | membrane-enclosed lumen                                        | 0.0274              | -2.6580                   |
| GO:0045267               | proton-transporting ATP synthase, catalytic core               | 0.0001              | -2.6293                   |
| GO:0043226               | organelle                                                      | 0.2079              | -2.6264                   |
| GO:0043229               | intracellular organelle                                        | 0.1992              | -2.6264                   |
| GO:0045259               | proton-transporting ATP synthase complex                       | 0.0049              | -2.4333                   |
| GO:0009277               | fungus-type cell wall                                          | 0.0003              | -2.1899                   |
| GO:0005618               | cell wall                                                      | 0.0029              | -1.9869                   |
| GO:0030132               | clathrin coat of coated pit                                    | 0.0004              | -1.9834                   |
| GO:0005773               | vacuole                                                        | 0.0046              | -1.9631                   |
| GO:0000323               | lytic vacuole                                                  | 0.0026              | -1.9406                   |
| GO:0031090               | organelle membrane                                             | 0.0200              | -1.8981                   |

**Table S4.** Cont.

| <b>GO Term</b>       | <b>Name</b>                                                    | <b>Result Freq.</b> | <b>log<sub>10</sub> p</b> |
|----------------------|----------------------------------------------------------------|---------------------|---------------------------|
| GO:0005844           | polysome                                                       | 0.0004              | -1.8800                   |
| GO:0005788           | endoplasmic reticulum lumen                                    | 0.0003              | -1.8800                   |
| GO:0030312           | external encapsulating structure                               | 0.0092              | -1.8099                   |
| GO:0098589           | membrane region                                                | 0.0012              | -1.7888                   |
| GO:0005576           | extracellular region                                           | 0.0238              | -1.6949                   |
| GO:0098796           | membrane protein complex                                       | 0.0247              | -1.6305                   |
| GO:0005625           | (obsolete) soluble fraction                                    | 0.0014              | -1.6242                   |
| GO:0016469           | proton-transporting two-sector ATPase complex                  | 0.0066              | -1.5526                   |
| GO:0022626           | cytosolic ribosome                                             | 0.0019              | -1.5342                   |
| GO:0070069           | cytochrome complex                                             | 0.0010              | -1.5058                   |
| GO:0043228           | non-membrane-bounded organelle                                 | 0.0841              | -1.4612                   |
| GO:0044445           | cytosolic part                                                 | 0.0050              | -1.4255                   |
| GO:0005952           | cAMP-dependent protein kinase complex                          | 0.0001              | -1.4000                   |
| GO:0017102           | methionyl glutamyl tRNA synthetase complex                     | 0.0001              | -1.4000                   |
| GO:0005853           | eukaryotic translation elongation factor 1 complex             | 0.0001              | -1.4000                   |
| GO:0030658           | transport vesicle membrane                                     | 0.0010              | -1.3970                   |
| GO:0070469           | respiratory chain                                              | 0.0030              | -1.3028                   |
| <b>K54A 0 v 10mM</b> |                                                                |                     |                           |
| GO:0005740           | mitochondrial envelope                                         | 0.0090              | -3.4427                   |
| GO:0044444           | cytoplasmic part                                               | 0.1266              | -3.0460                   |
| GO:0031975           | envelope                                                       | 0.0232              | -2.9488                   |
| GO:0005737           | cytoplasm                                                      | 0.2602              | -2.7850                   |
| GO:0005739           | mitochondrion                                                  | 0.0216              | -2.6358                   |
| GO:0098796           | membrane protein complex                                       | 0.0247              | -2.5098                   |
| GO:0031090           | organelle membrane                                             | 0.0200              | -2.2217                   |
| GO:0000783           | nuclear telomere cap complex                                   | 0.0001              | -2.1826                   |
| GO:0045267           | proton-transporting ATP synthase, catalytic core               | 0.0001              | -2.1826                   |
| GO:0005754           | mitochondrial proton-transporting ATP synthase, catalytic core | 0.0001              | -2.1826                   |
| GO:0005829           | cytosol                                                        | 0.0255              | -2.0396                   |
| GO:0044422           | organelle part                                                 | 0.0943              | -1.9536                   |
| GO:0044446           | intracellular organelle part                                   | 0.0894              | -1.9536                   |
| GO:0045277           | respiratory chain complex IV                                   | 0.0005              | -1.8830                   |
| GO:0030132           | clathrin coat of coated pit                                    | 0.0004              | -1.8165                   |
| GO:0098589           | membrane region                                                | 0.0012              | -1.7082                   |
| GO:0070069           | cytochrome complex                                             | 0.0010              | -1.5503                   |
| GO:0030658           | transport vesicle membrane                                     | 0.0010              | -1.4891                   |
| GO:0070469           | respiratory chain                                              | 0.0030              | -1.4356                   |
| GO:0032991           | macromolecular complex                                         | 0.1401              | -1.3546                   |
| GO:0043226           | organelle                                                      | 0.2079              | -1.3263                   |
| GO:0043229           | intracellular organelle                                        | 0.1992              | -1.3263                   |
| GO:0098797           | plasma membrane protein complex                                | 0.0094              | -1.3259                   |

**Table S5.** KEGG pathway terms enriched among DEPs in *A. flavus* isolates in response to oxidative stress.

| Pathway ID               | Name                                        | Result Count | p-value |
|--------------------------|---------------------------------------------|--------------|---------|
| <b>AF13 0 v 10mM</b>     |                                             |              |         |
| ec00710                  | Carbon fixation in photosynthetic organisms | 3            | 0.0001  |
| ec00531                  | Glycosaminoglycan degradation               | 3            | 0.0009  |
| ec00500                  | Starch and sucrose metabolism               | 3            | 0.0051  |
| ec00513                  | Various types of N-glycan biosynthesis      | 2            | 0.0081  |
| ec00630                  | Glyoxylate and dicarboxylate metabolism     | 2            | 0.0114  |
| ec00620                  | Pyruvate metabolism                         | 2            | 0.0166  |
| ec00010                  | Glycolysis / Gluconeogenesis                | 2            | 0.0195  |
| ec00430                  | Taurine and hypotaurine metabolism          | 1            | 0.0355  |
| <b>AF13 0 v 25mM</b>     |                                             |              |         |
| ec00520                  | Amino sugar and nucleotide sugar metabolism | 2            | 0.0311  |
| <b>NRRL3357 0 v 10mM</b> |                                             |              |         |
| ec00620                  | Pyruvate metabolism                         | 4            | <0.0001 |
| ec00720                  | Carbon fixation pathways in prokaryotes     | 3            | 0.0013  |
| ec00710                  | Carbon fixation in photosynthetic organisms | 2            | 0.0013  |
| ec00020                  | Citrate cycle (TCA cycle)                   | 2            | 0.0016  |
| ec00630                  | Glyoxylate and dicarboxylate metabolism     | 2            | 0.0032  |
| ec00280                  | Valine, leucine and isoleucine degradation  | 2            | 0.0041  |
| ec00010                  | Glycolysis / Gluconeogenesis                | 2            | 0.0056  |
| ec00071                  | Fatty acid degradation                      | 2            | 0.0097  |
| ec00072                  | Synthesis and degradation of ketone bodies  | 1            | 0.0175  |
| <b>NRRL3357 0 v 20mM</b> |                                             |              |         |
| ec00020                  | Citrate cycle (TCA cycle)                   | 8            | <0.0001 |
| ec00630                  | Glyoxylate and dicarboxylate metabolism     | 9            | <0.0001 |
| ec00620                  | Pyruvate metabolism                         | 9            | <0.0001 |
| ec00710                  | Carbon fixation in photosynthetic organisms | 7            | <0.0001 |
| ec00010                  | Glycolysis / Gluconeogenesis                | 7            | 0.0003  |
| ec00480                  | Glutathione metabolism                      | 7            | 0.0005  |
| ec00250                  | Alanine, aspartate and glutamate metabolism | 6            | 0.0010  |
| ec00720                  | Carbon fixation pathways in prokaryotes     | 9            | 0.0010  |
| ec00500                  | Starch and sucrose metabolism               | 7            | 0.0047  |
| ec00531                  | Glycosaminoglycan degradation               | 5            | 0.0050  |
| ec00520                  | Amino sugar and nucleotide sugar metabolism | 8            | 0.0249  |
| ec00270                  | Cysteine and methionine metabolism          | 6            | 0.0403  |
| ec00030                  | Pentose phosphate pathway                   | 3            | 0.0435  |
| <b>K54A 0 v 10mM</b>     |                                             |              |         |
| ec00010                  | Glycolysis / Gluconeogenesis                | 2            | 0.0056  |

**Table S6.** Annotations of specific proteins in the protein-protein interaction analysis for NRRL3357.

| <b>ID</b>   | <b>STRING ID</b> | <b>Annotation</b>                                              |
|-------------|------------------|----------------------------------------------------------------|
| AFLA_001890 | CADAFLAP00010255 | Cellobiose dehydrogenase                                       |
| AFLA_002090 | CADAFLAP00010275 | Extracellular serine carboxypeptidase, putative                |
| AFLA_002560 | CADAFLAP00010322 | 60S ribosomal protein L37a                                     |
| AFLA_002670 | CADAFLAP00010333 | Curved DNA-binding protein (42 kDa protein)                    |
| AFLA_003440 | CADAFLAP00010410 | Translation initiation factor 4B                               |
| AFLA_004950 | CADAFLAP00010561 | Cytochrome c oxidase subunit Va, putative                      |
| AFLA_006300 | CADAFLAP00010695 | Nucleoside diphosphate kinase (EC 2.7.4.6)                     |
| AFLA_006520 | CADAFLAP00010715 | CRAL/TRIO domain protein                                       |
| AFLA_006960 | CADAFLAP00010759 | Molecular chaperone and allergen Mod-E/Hsp90/Hsp1              |
| AFLA_007000 | CADAFLAP00010763 | Ubiquinol-cytochrome C reductase complex core protein 2        |
| AFLA_007020 | CADAFLAP00010765 | Citrate synthase                                               |
| AFLA_007700 | CADAFLAP00012881 | Putative uncharacterized protein                               |
| AFLA_008310 | CADAFLAP00012942 | Acetyl-CoA-acetyltransferase, putative                         |
| AFLA_008990 | cpyA             | Carboxypeptidase CpyA/Prc1, putative                           |
| AFLA_012160 | CADAFLAP00013326 | Acetyl-CoA acetyltransferase, putative                         |
| AFLA_012200 | CADAFLAP00013330 | Hsp70 chaperone (HscA), putative                               |
| AFLA_014520 | CADAFLAP00003337 | Multicopper oxidase, putative                                  |
| AFLA_014930 | CADAFLAP00003378 | Cofactor for methionyl- and glutamyl-tRNA synthetase, putative |
| AFLA_017100 | lacA             | Beta-galactosidase (EC 3.2.1.23)                               |
| AFLA_019230 | CADAFLAP00003808 | Mismatched base pair and cruciform DNA recognition protein     |
| AFLA_020380 | CADAFLAP00003923 | Stomatin family protein                                        |
| AFLA_021820 | CADAFLAP00004067 | Nuclear movement protein NudC                                  |
| AFLA_021870 | cbhA             | Cellobiohydrolase celD                                         |
| AFLA_022270 | CADAFLAP00004112 | Putative uncharacterized protein                               |
| AFLA_022380 | CADAFLAP00004123 | Molecular chaperone Hsp70                                      |
| AFLA_022470 | ADK1             | Adenylate kinase, putative                                     |
| AFLA_022480 | CADAFLAP00004133 | 26S proteasome regulatory particle subunit Rpn8, putative      |
| AFLA_023500 | CADAFLAP00001726 | Extracellular conserved serine-rich protein                    |
| AFLA_025100 | CADAFLAP00001886 | Glyceraldehyde 3-phosphate dehydrogenase (EC 1.2.1.12)         |
| AFLA_025510 | CADAFLAP00001927 | GPI anchored protein, putative                                 |
| AFLA_025760 | CADAFLAP00001951 | 50S ribosomal protein L12                                      |
| AFLA_025980 | CADAFLAP00001973 | Hsp90 co-chaperone Cdc37                                       |
| AFLA_025990 | CADAFLAP00001974 | Clathrin light chain                                           |
| AFLA_026140 | CADAFLAP00001989 | Alpha-amylase, putative                                        |
| AFLA_026470 | CADAFLAP00002022 | Aspartate aminotransferase (EC 2.6.1.1)                        |
| AFLA_027070 | CADAFLAP00002082 | Acetyl-coenzyme A synthetase FacA                              |
| AFLA_027810 | alp              | Alkaline protease                                              |
| AFLA_028260 | exgA             | Exo-beta-1,3-glucanase (Exg1), putative                        |
| AFLA_028800 | CADAFLAP00002255 | Eukaryotic translation initiation factor eIF-5A                |
| AFLA_028910 | CADAFLAP00002266 | Polyadenylate-binding protein                                  |
| AFLA_029310 | CADAFLAP00002306 | Alcohol dehydrogenase, zinc-containing, putative               |
| AFLA_029390 | CADAFLAP00002314 | HMG box protein, putative                                      |
| AFLA_029440 | CADAFLAP00002319 | NADH-cytochrome b5 reductase, putative                         |
| AFLA_029850 | CADAFLAP00002360 | Cysteine-rich secreted protein                                 |

**Table S6.** Cont.

| <b>ID</b>   | <b>STRING ID</b> | <b>Annotation</b>                                                  |
|-------------|------------------|--------------------------------------------------------------------|
| AFLA_030140 | CADAFLAP00002389 | 60S ribosomal protein P0                                           |
| AFLA_030180 | CADAFLAP00002393 | Protein mitochondrial targeting protein (Mas1), putative           |
| AFLA_030860 | CADAFLAP00002461 | RNAPII degradation factor Def1, putative                           |
| AFLA_031570 | CADAFLAP00002532 | Pyruvate decarboxylase PdcA, putative                              |
| AFLA_031760 | CADAFLAP00002551 | Glutaminase, putative                                              |
| AFLA_031780 | CADAFLAP00002553 | Telomere and ribosome associated protein Stm1, putative            |
| AFLA_031960 | CADAFLAP00002571 | 40S ribosomal protein S7e                                          |
| AFLA_032870 | CADAFLAP00002662 | cAMP-dependent protein kinase regulatory subunit PkaR              |
| AFLA_032890 | CADAFLAP00002664 | Putative uncharacterized protein                                   |
| AFLA_033100 | CADAFLAP00002685 | Phosphatidylinositol transporter, putative                         |
| AFLA_033400 | CADAFLAP00002715 | Mannosidase MsdS                                                   |
| AFLA_033620 | CADAFLAP00002737 | RNA binding protein, putative                                      |
| AFLA_034050 | CADAFLAP00002780 | Mitochondrial aconitate hydratase, putative                        |
| AFLA_034640 | CADAFLAP00002839 | Aminopeptidase Y, putative                                         |
| AFLA_034870 | CADAFLAP00002862 | Putative uncharacterized protein                                   |
| AFLA_035510 | CADAFLAP00002926 | RNA binding effector protein Scp160, putative                      |
| AFLA_035540 | CADAFLAP00002929 | Signal transducing adapter molecule, putative                      |
| AFLA_035620 | CADAFLAP00002937 | Hsp70 chaperone BiP/Kar2, putative                                 |
| AFLA_036070 | CADAFLAP00002982 | Maleylacetoacetate isomerase MaiA                                  |
| AFLA_036110 | CADAFLAP00002986 | 4-hydroxyphenylpyruvate dioxygenase, putative                      |
| AFLA_036440 | CADAFLAP00003019 | Alanine aminotransferase, putative                                 |
| AFLA_036640 | CADAFLAP00003039 | PH domain protein                                                  |
| AFLA_036840 | CADAFLAP00003058 | 6-phosphogluconate dehydrogenase, decarboxylating                  |
| AFLA_037490 | HCR1             | Eukaryotic translation initiation factor 3 subunit EifCj, putative |
| AFLA_037960 | CADAFLAP00003169 | Glucosamine-fructose-6-phosphate aminotransferase                  |
| AFLA_038530 | CADAFLAP00005181 | Elastinolytic metalloproteinase Mep                                |
| AFLA_038700 | CADAFLAP00005198 | Putative uncharacterized protein                                   |
| AFLA_038790 | CADAFLAP00005207 | Adenosine deaminase family protein                                 |
| AFLA_039410 | CADAFLAP00005268 | Antigenic cell wall protein MP1                                    |
| AFLA_040120 | CADAFLAP00005339 | Flavohepotein                                                      |
| AFLA_041260 | CADAFLAP00005453 | Ribosome associated DnaJ chaperone Zuotin, putative                |
| AFLA_042090 | CADAFLAP00005536 | Fasciclin domain family protein                                    |
| AFLA_042700 | CADAFLAP00005597 | Pre-mRNA splicing factor (Prp24), putative                         |
| AFLA_043390 | CADAFLAP00005666 | Hsp70 chaperone (BiP), putative                                    |
| AFLA_043730 | CADAFLAP00005700 | Nuclear protein export protein Yrb2, putative                      |
| AFLA_044090 | CADAFLAP00005736 | Uricase (EC 1.7.3.3)(Urate oxidase)                                |
| AFLA_044620 | CADAFLAP00005789 | Mitochondrial Hsp70 chaperone (Ssc70), putative                    |
| AFLA_044820 | CADAFLAP00005809 | Glucose-6-phosphate isomerase (EC 5.3.1.9)                         |
| AFLA_045330 | CADAFLAP00005860 | Eukaryotic translation initiation factor subunit eIF-4F, putative  |
| AFLA_045750 | CADAFLAP00005902 | Antigenic mitochondrial protein HSP60, putative                    |
| AFLA_045980 | dpp5             | Secreted dipeptidyl peptidase DppV                                 |
| AFLA_046730 | CADAFLAP00006000 | Putative uncharacterized protein                                   |
| AFLA_047350 | pepP             | Prolidase pepP, putative                                           |
| AFLA_048510 | CADAFLAP00010843 | UV excision repair protein (RadW), putative                        |
| AFLA_048610 | CADAFLAP00010853 | Succinyl-CoA synthetase alpha subunit, putative                    |

**Table S6.** Cont.

| <b>ID</b>   | <b>STRING ID</b> | <b>Annotation</b>                                              |
|-------------|------------------|----------------------------------------------------------------|
| AFLA_050690 | CADAFLAP00011061 | Mitochondrial ADP,ATP carrier protein (Ant), putative          |
| AFLA_051140 | bgIA             | Beta-glucosidase, putative                                     |
| AFLA_051770 | CADAFLAP00011168 | Thioredoxin reductase (EC 1.8.1.9)                             |
| AFLA_052400 | CADAFLAP00011231 | Isocitrate lyase AcuD                                          |
| AFLA_054750 | CADAFLAP00006084 | Malate dehydrogenase, NAD-dependent                            |
| AFLA_055060 | CADAFLAP00006115 | NAD-dependent formate dehydrogenase AciA/Fdh                   |
| AFLA_055230 | CADAFLAP00006132 | Actin Act1                                                     |
| AFLA_055450 | CADAFLAP00006154 | Translation elongation factor eEF-1 subunit gamma, putative    |
| AFLA_056170 | CADAFLAP00006226 | Catalase (EC 1.11.1.6)                                         |
| AFLA_056260 | CADAFLAP00006235 | Nascent polypeptide-associated complex (NAC) subunit, putative |
| AFLA_056350 | CADAFLAP00006244 | 2-methylcitrate dehydratase, putative                          |
| AFLA_056850 | CADAFLAP00006294 | Electron transfer flavoprotein, beta subunit, putative         |
| AFLA_057240 | CADAFLAP00006333 | RNP domain protein                                             |
| AFLA_057670 | CADAFLAP00006376 | Neutral protease 2, putative                                   |
| AFLA_057770 | plyA             | Pectate lyase A                                                |
| AFLA_058390 | NTH1             | DNA repair protein Ntg1, putative                              |
| AFLA_060110 | CADAFLAP00006620 | Putative uncharacterized protein                               |
| AFLA_060260 | CADAFLAP00006635 | Heat shock protein Hsp30/Hsp42, putative                       |
| AFLA_061880 | CADAFLAP00006797 | Pyridoxine biosynthesis protein                                |
| AFLA_066270 | CADAFLAP00008051 | RNA-binding La domain protein                                  |
| AFLA_067940 | CADAFLAP00008218 | Putative uncharacterized protein                               |
| AFLA_068840 | CADAFLAP00008308 | Glycine cleavage system T protein                              |
| AFLA_069010 | CADAFLAP00008325 | S-adenosylmethionine synthetase (EC 2.5.1.6)                   |
| AFLA_069370 | CADAFLAP00008361 | Phosphoglycerate kinase (EC 2.7.2.3)                           |
| AFLA_069590 | CADAFLAP00008383 | Adenosylhomocysteinase (EC 3.3.1.1)                            |
| AFLA_070490 | CADAFLAP00008473 | Putative uncharacterized protein                               |
| AFLA_070990 | CADAFLAP00008523 | UTP-glucose-1-phosphate uridylyltransferase Ugp1, putative     |
| AFLA_071010 | CADAFLAP00008525 | Heat shock protein (Sti1), putative                            |
| AFLA_073480 | CADAFLAP00000131 | Tropomyosin, putative                                          |
| AFLA_074520 | aglA             | Alpha-galactosidase, putative                                  |
| AFLA_076170 | CADAFLAP00000399 | Putative uncharacterized protein                               |
| AFLA_076180 | CADAFLAP00000400 | Putative uncharacterized protein                               |
| AFLA_076450 | CADAFLAP00000427 | Electron transfer flavoprotein alpha subunit, putative         |
| AFLA_076710 | CADAFLAP00000453 | Malate dehydrogenase, NAD-dependent                            |
| AFLA_077860 | CADAFLAP00000568 | Putative uncharacterized protein                               |
| AFLA_078380 | CADAFLAP00000620 | Acetyl-coA hydrolase Ach1, putative                            |
| AFLA_078650 | CADAFLAP00000647 | ATP synthase subunit alpha                                     |
| AFLA_078900 | CADAFLAP00000672 | Beta-N-acetylhexosaminidase NagA, putative                     |
| AFLA_079480 | CADAFLAP00000730 | Oligopeptidase family protein                                  |
| AFLA_080390 | CADAFLAP00000821 | 6-phosphogluconolactonase, putative                            |
| AFLA_080930 | CADAFLAP00000874 | EF hand domain protein                                         |
| AFLA_082510 | CADAFLAP00001031 | TCTP family protein                                            |
| AFLA_083370 | CADAFLAP00001117 | Glutathione oxidoreductase Glr1, putative                      |
| AFLA_086710 | CADAFLAP00001450 | Inorganic diphosphatase, putative                              |
| AFLA_086900 | CADAFLAP00001469 | Alpha-mannosidase                                              |



**Table S6.** Cont.

| <b>ID</b>   | <b>STRING ID</b> | <b>Annotation</b>                                       |
|-------------|------------------|---------------------------------------------------------|
| AFLA_087950 | CADAFLAP00001573 | Isocitrate dehydrogenase LysB                           |
| AFLA_088570 | CADAFLAP00001635 | Putative uncharacterized protein                        |
| AFLA_089270 | CADAFLAP00008613 | BZIP transcription factor HacA                          |
| AFLA_089380 | CADAFLAP00008624 | Extracellular chitosanase CsnC, putative                |
| AFLA_090690 | CADAFLAP00008754 | Mycelial catalase Cat1                                  |
| AFLA_091030 | CADAFLAP00008788 | Putative uncharacterized protein                        |
| AFLA_091060 | CADAFLAP00008791 | Allergen Asp F3                                         |
| AFLA_091270 | CADAFLAP00008812 | Fumarate hydratase, putative                            |
| AFLA_091990 | CADAFLAP00008884 | Peptidyl-prolyl cis-trans isomerase (EC 5.2.1.8)        |
| AFLA_092640 | CADAFLAP00008949 | Alkaline phosphatase (EC 3.1.3.1)                       |
| AFLA_093220 | CADAFLAP00009007 | Ran-specific GTPase-activating protein 1, putative      |
| AFLA_093280 | CADAFLAP00009013 | Disulfide isomerase (TigA), putative                    |
| AFLA_093660 | CADAFLAP00009051 | Solid-state culture expressed protein (Aos23), putative |
| AFLA_094630 | CADAFLAP00009148 | Triosephosphate isomerase (EC 5.3.1.1)                  |
| AFLA_095570 | CADAFLAP00009242 | RNA annealing protein Yra1, putative                    |
| AFLA_095660 | CADAFLAP00009251 | Immunoglobulin G-binding protein H, putative            |
| AFLA_097190 | CADAFLAP00011457 | Putative uncharacterized protein                        |
| AFLA_097750 | CADAFLAP00011513 | Putative uncharacterized protein                        |
| AFLA_099000 | CADAFLAP00011638 | Superoxide dismutase [Cu-Zn] (EC 1.15.1.1)              |
| AFLA_099220 | CADAFLAP00011660 | Putative uncharacterized protein                        |
| AFLA_099650 | CADAFLAP00011702 | Woronin body major protein, putative                    |
| AFLA_101160 | CADAFLAP00011853 | 40S ribosomal protein S9                                |
| AFLA_101930 | CADAFLAP00011930 | Succinate-semialdehyde dehydrogenase, putative          |
| AFLA_102010 | CADAFLAP00011938 | Class V chitinase, putative                             |
| AFLA_103940 | CADAFLAP00012129 | Glutamate carboxypeptidase, putative                    |
| AFLA_105920 | pgaB             | Polygalacturonase A Precursor (EC 3.2.1.15)             |
| AFLA_106310 | CADAFLAP00004367 | Chaperonin, putative                                    |
| AFLA_106350 | CADAFLAP00004371 | ATP citrate lyase subunit (Acl), putative               |
| AFLA_108100 | CADAFLAP00004546 | Argininosuccinate synthase (EC 6.3.4.5)                 |
| AFLA_108410 | CADAFLAP00004576 | Dipeptidase, putative                                   |
| AFLA_108790 | CADAFLAP00004614 | Aldehyde dehydrogenase AldA, putative                   |
| AFLA_109320 | CADAFLAP00004666 | 3-hydroxyisobutyrate dehydrogenase                      |
| AFLA_110160 | dpp4             | Extracellular dipeptidyl-peptidase Dpp4                 |
| AFLA_110260 | CADAFLAP00004760 | Flavin-binding monooxygenase-like protein               |
| AFLA_110600 | CADAFLAP00004794 | Aminopeptidase                                          |
| AFLA_110690 | CADAFLAP00004803 | Cytochrome c peroxidase Ccp1, putative                  |
| AFLA_111100 | CADAFLAP00004844 | Mitochondrial peroxiredoxin Prx1, putative              |
| AFLA_112120 | CADAFLAP00004946 | Pyruvate carboxylase, putative                          |
| AFLA_112130 | CADAFLAP00004947 | Clathrin heavy chain                                    |
| AFLA_112470 | CADAFLAP00004981 | Cobalamin-independent methionine synthase Meth/D        |
| AFLA_112910 | CADAFLAP00005025 | Putative uncharacterized protein                        |
| AFLA_113000 | CADAFLAP00005034 | Integral ER membrane protein Scs2, putative             |
| AFLA_117760 | CADAFLAP00012348 | Phytase, putative                                       |
| AFLA_117850 | CADAFLAP00012357 | RPEL repeat protein                                     |
| AFLA_119040 | CADAFLAP00012476 | Muramidase, putative                                    |

**Table S6.** Cont.

| <b>ID</b>   | <b>STRING ID</b> | <b>Annotation</b>                                     |
|-------------|------------------|-------------------------------------------------------|
| AFLA_119660 | CADAFLAP00012538 | ATP synthase subunit beta (EC 3.6.3.14)               |
| AFLA_120630 | CADAFLAP00012635 | Glyoxylate/hydroxypyruvate reductase, putative        |
| AFLA_122110 | CADAFLAP00012783 | Bifunctional catalase-peroxidase Cat2                 |
| AFLA_122180 | CADAFLAP00012790 | Putative uncharacterized protein                      |
| AFLA_122720 | CADAFLAP00012843 | Actin binding protein, putative                       |
| AFLA_124380 | CADAFLAP00009496 | Putative uncharacterized protein                      |
| AFLA_124500 | CADAFLAP00009508 | Nitric oxide synthase, putative                       |
| AFLA_125270 | CADAFLAP00009585 | Tyrosinase                                            |
| AFLA_126870 | CADAFLAP00009745 | Putative uncharacterized protein                      |
| AFLA_127390 | CADAFLAP00009797 | Proteasome regulatory particle subunit Rpt5, putative |
| AFLA_128280 | CADAFLAP00009886 | M protein repeat protein                              |
| AFLA_128530 | CADAFLAP00009911 | Delta-1-pyrroline-5-carboxylate dehydrogenase PrnC    |
| AFLA_130150 | CADAFLAP00010073 | NAD+ dependent glutamate dehydrogenase, putative      |
| AFLA_130310 | CADAFLAP00010089 | Protein disulfide isomerase Pdi1, putative            |
| AFLA_131280 | CADAFLAP00007007 | Actin cortical patch assembly protein Pan1, putative  |
| AFLA_132540 | CADAFLAP00007133 | Thioredoxin TrxA                                      |
| AFLA_133150 | CADAFLAP00007194 | Catechol dioxygenase, putative                        |
| AFLA_133920 | CADAFLAP00007271 | Acyl CoA binding protein family                       |
| AFLA_133990 | CADAFLAP00007278 | Secretory pathway gdp dissociation inhibitor          |
| AFLA_134120 | CADAFLAP00007291 | Orotate phosphoribosyltransferase                     |
| AFLA_134340 | CADAFLAP00007312 | BAR domain protein                                    |
| AFLA_135200 | CADAFLAP00007398 | Putative uncharacterized protein                      |
| AFLA_135540 | CADAFLAP00007432 | ATP synthase                                          |
| AFLA_136570 | CADAFLAP00007535 | Cytochrome c                                          |
| AFLA_136640 | CADAFLAP00007542 | Translation elongation factor EF-2 subunit, putative  |
| AFLA_139300 | CADAFLAP00007806 | Ver-1                                                 |
| AFLA_139470 | cpaO             | FAD dependent oxidoreductase, putative                |
| AFLA_139480 | dmaT             | Dimethylallyl tryptophan synthase, putative           |
